# Supplementary material for: Tailoring the properties of 3d transition metal complexes with different N-cycloalkyl-substituted tetrazoles
Source: Royal Society of Chemistry journal article supplement (doi:10.1039/d1nj01675j), 2021-01-01
Supplement: d1nj01675j1.pdf [file d1nj01675j1.pdf]

## *Supplementary Information*

### Tailoring the properties of 3d transition metal complexes with different *N*- cycloalkyl-substituted tetrazoles

Vanessa Braun,<sup>a</sup> Maximilian H. H. Wurzenberger,<sup>a</sup> Valentin Weippert<sup>a</sup> and Jörg  
Stierstorfer<sup>\*a</sup>

<sup>a</sup> Department of Chemistry, Ludwig-Maximilian University of Munich, Butenandtstr. 5–13, D-81377  
Munich, Germany.

Dr. Jörg Stierstorfer, [jstch@cup.uni-muenchen.de](mailto:jstch@cup.uni-muenchen.de), FAX +49 89 2180 77007

#### **Table of Contents**

1. IR spectroscopy
2. <sup>1</sup>H-<sup>15</sup>N-HMBC NMR spectroscopy
3. X-ray diffraction
4. DTA plots
5. TGA plots
6. Hot plate and hot needle tests
7. Magnetic properties
8. Experimental part and general methods
9. References

1. IR spectroscopy

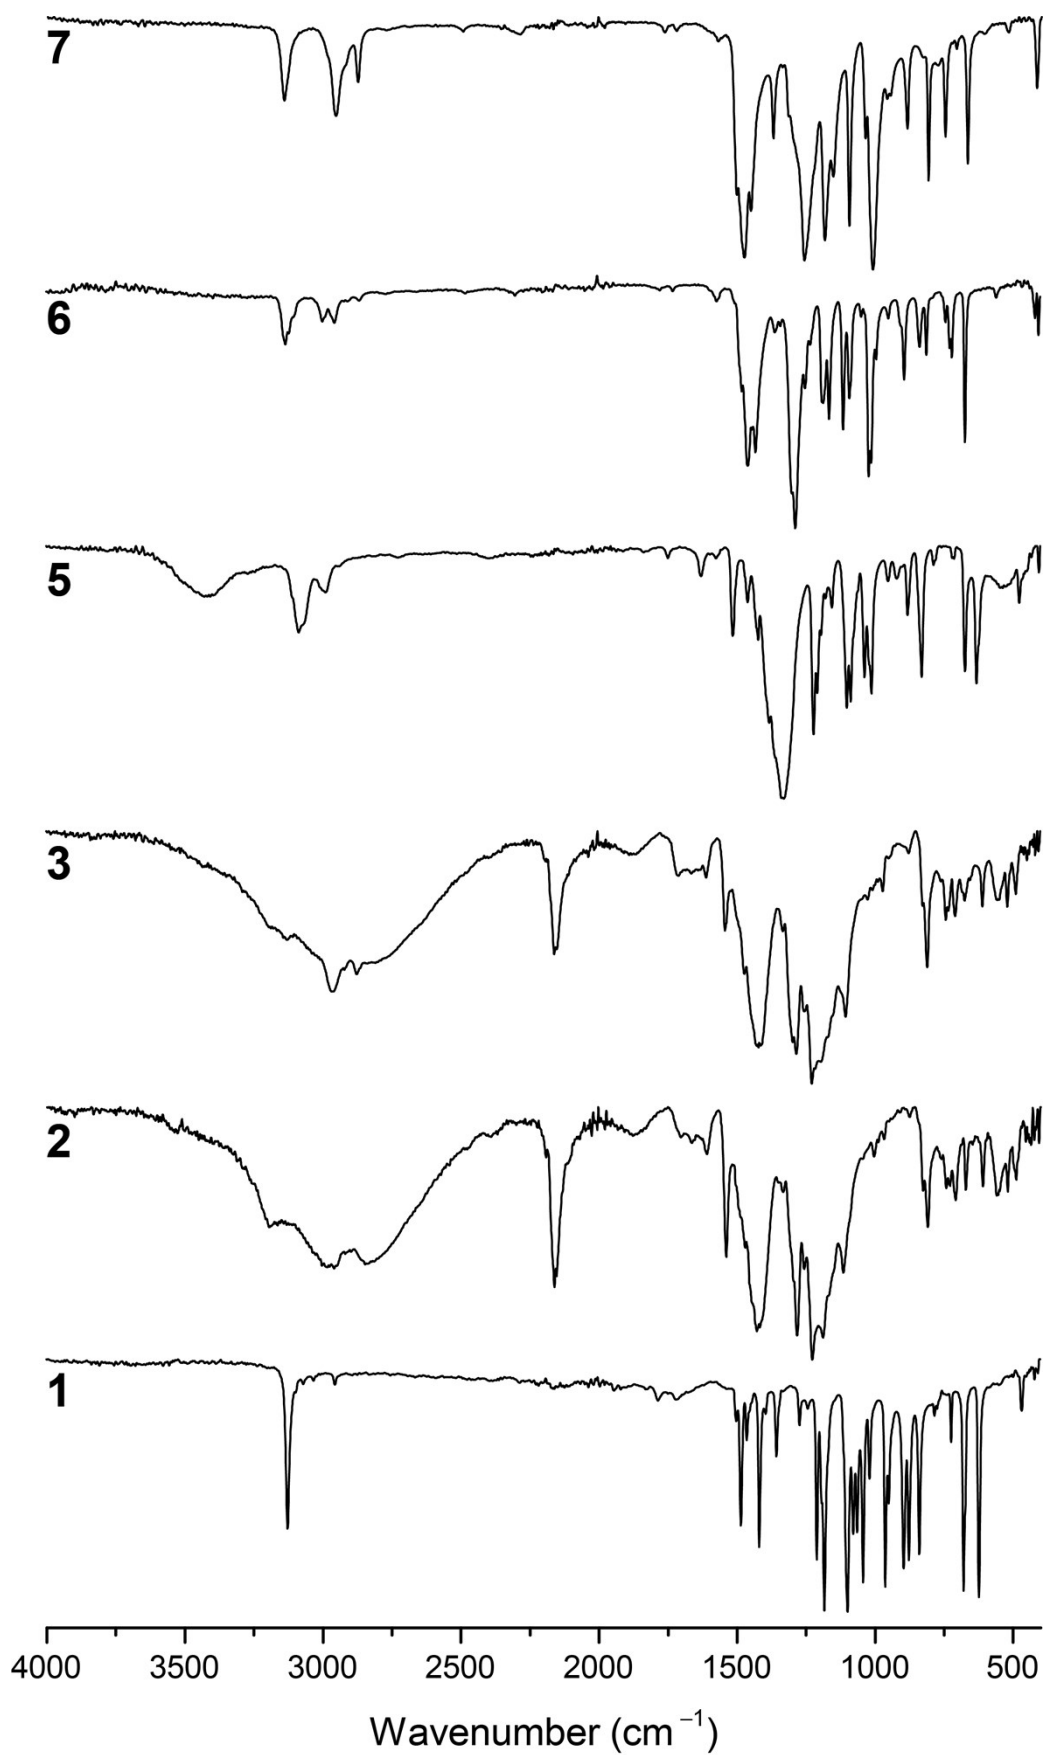

**Fig. S1** Infrared spectra of ligands 1–3 and copper(II) nitrate complexes 5–7.

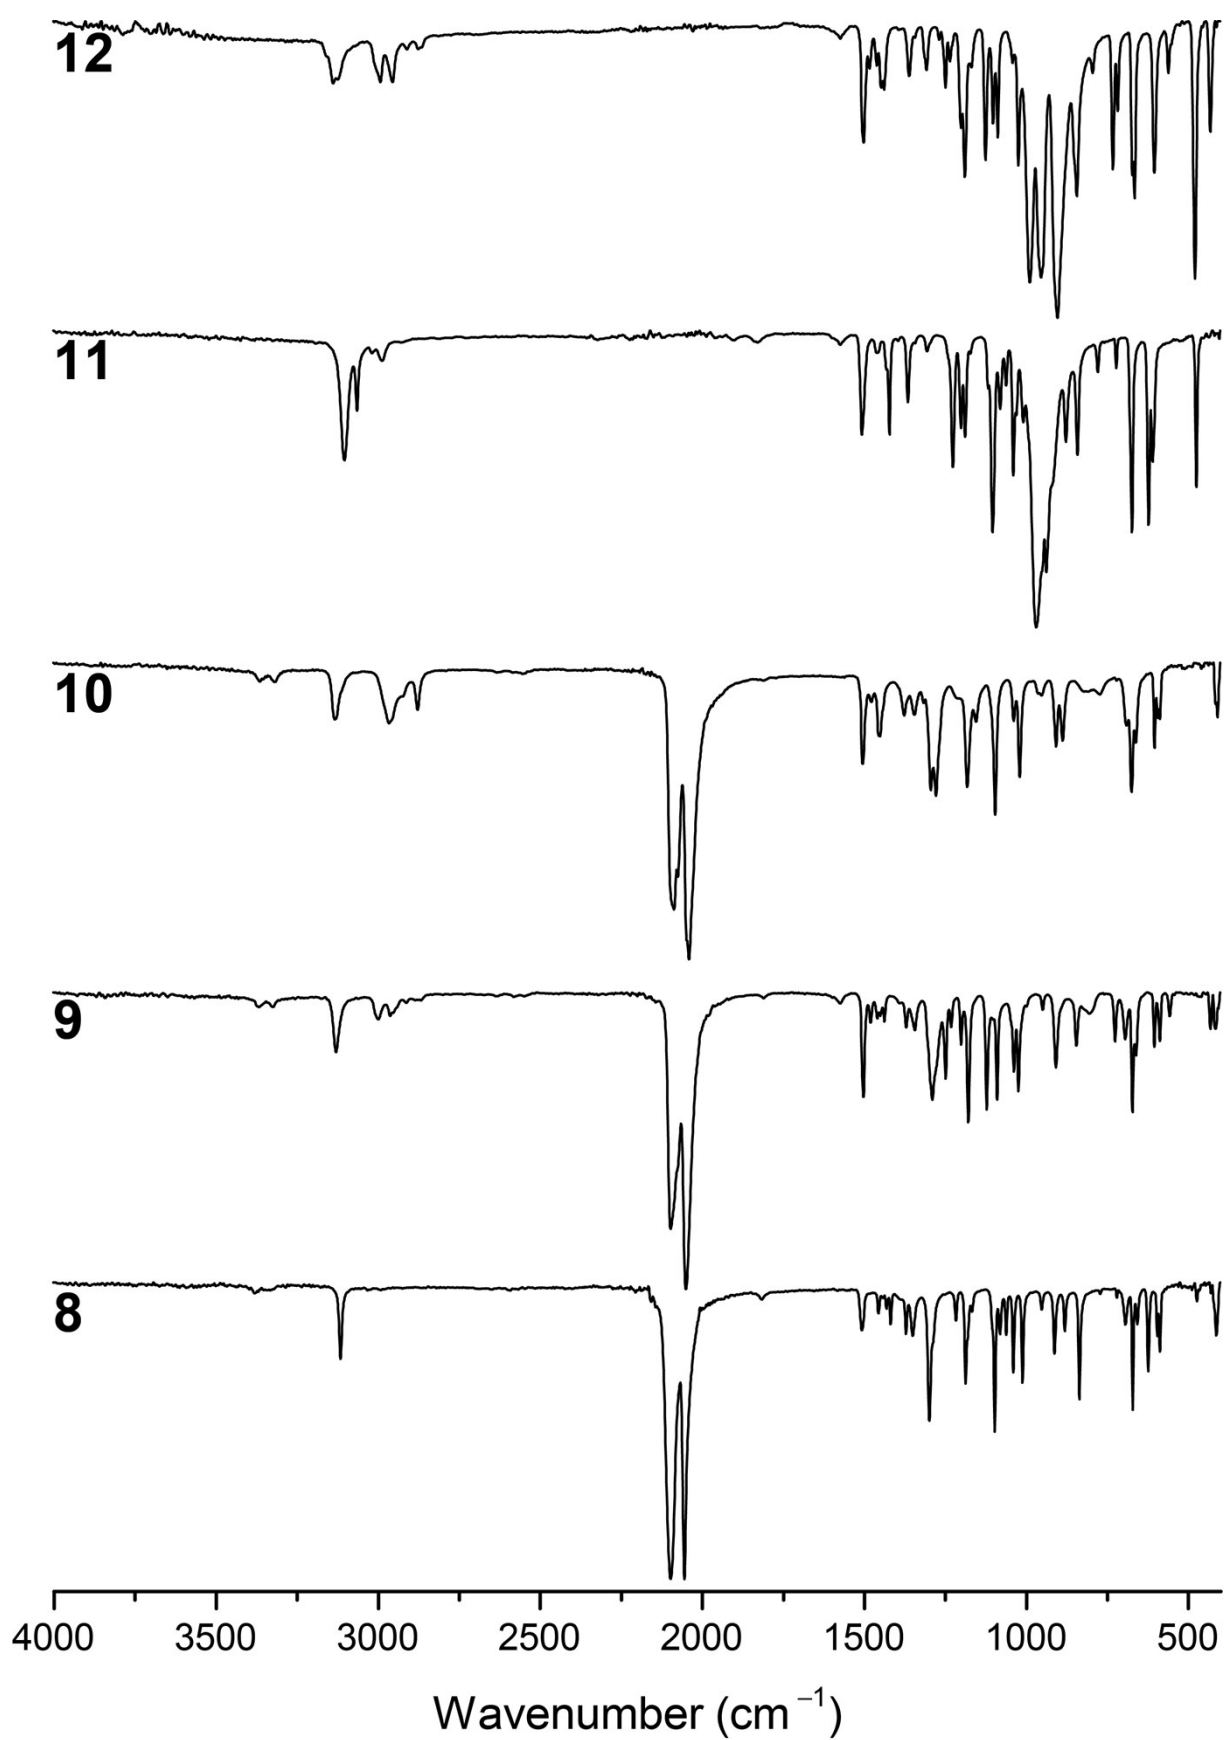

**Fig. S2** IR spectra of ECC 8–12.

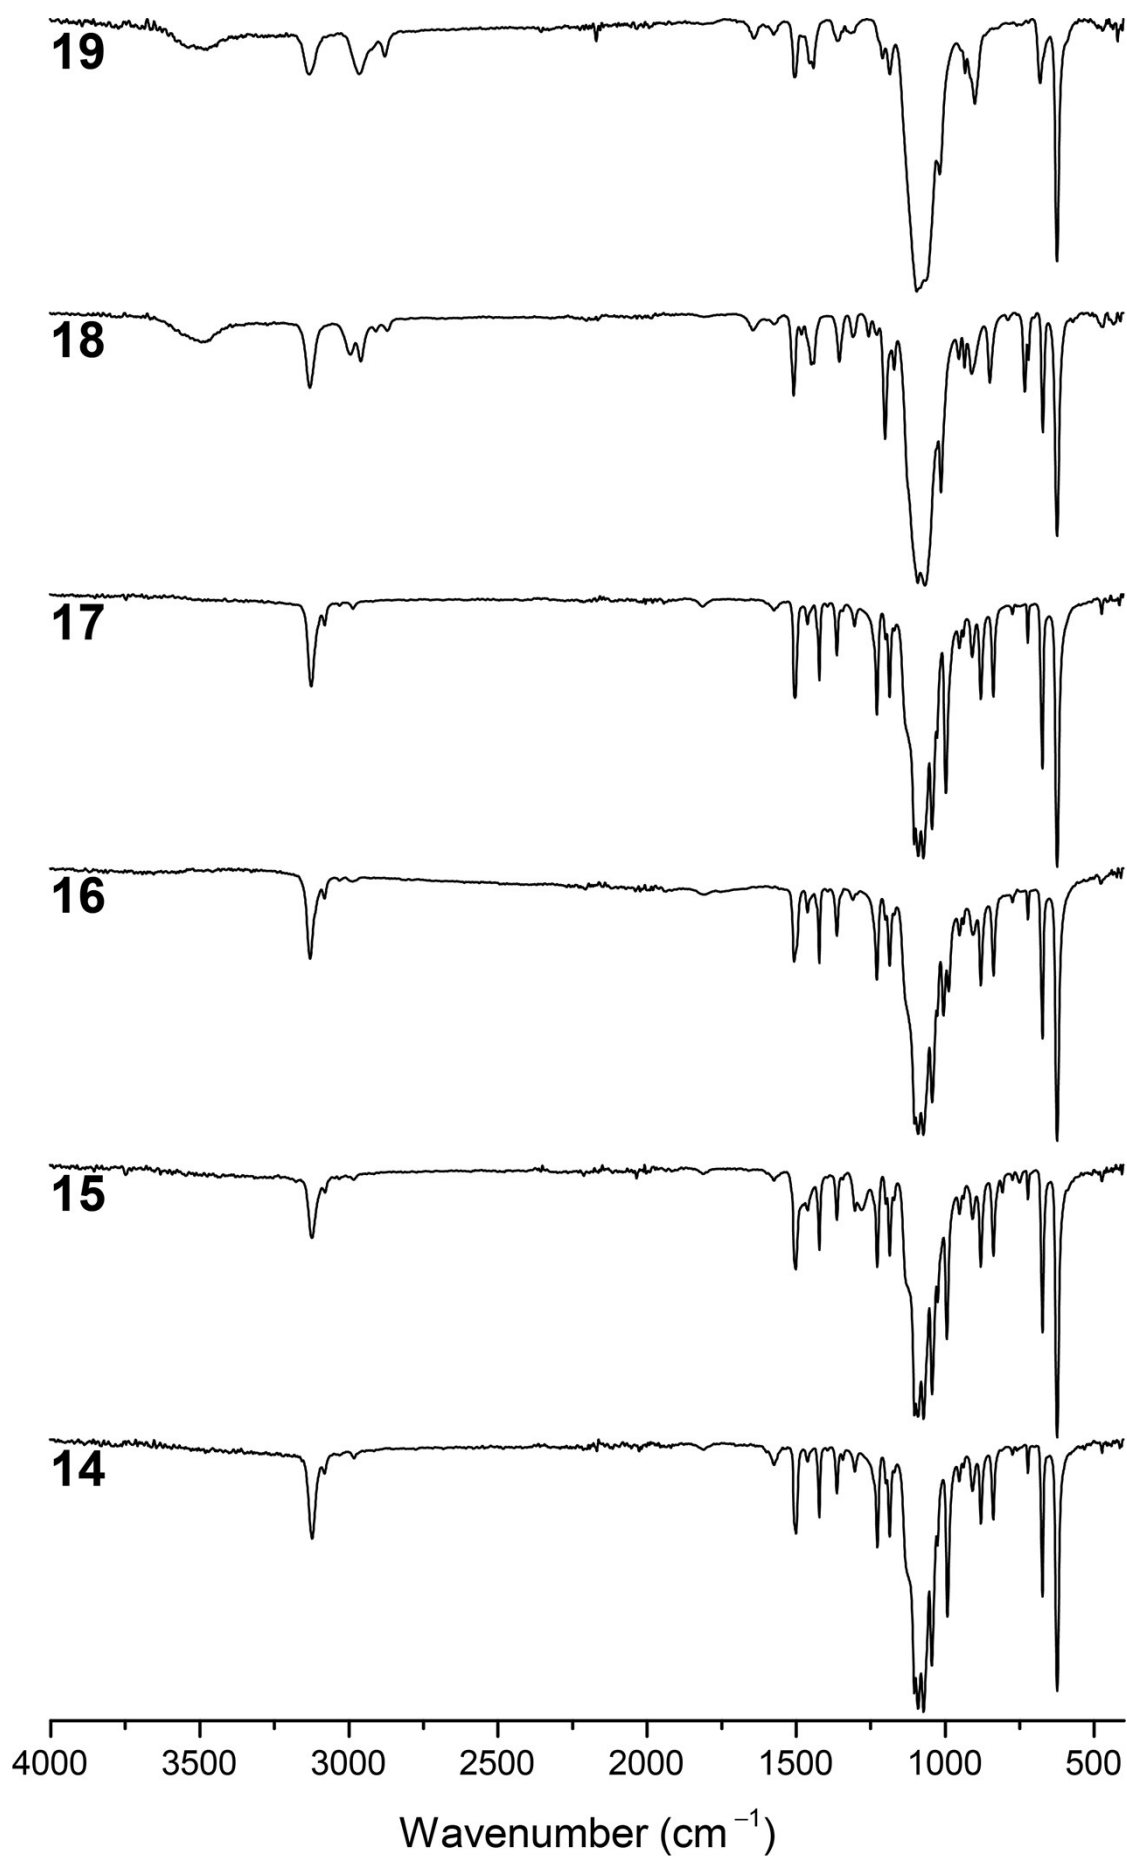

**Fig. S3** Infrared spectra of perchlorate compounds **14–19**.

## 2. $^1\text{H}$ - $^{15}\text{N}$ -HMBC NMR spectroscopy

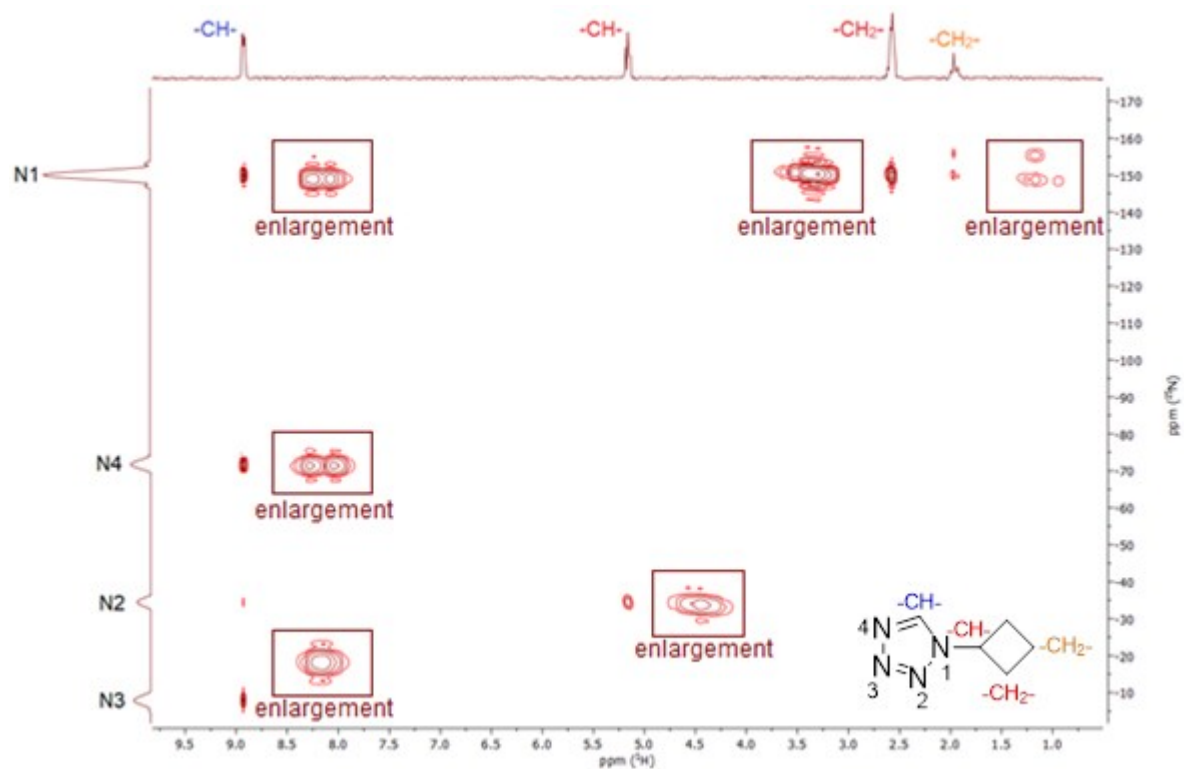

**Fig. S4**  $^1\text{H}$ - $^{15}\text{N}$ -HMBC NMR spectrum of ligand **C<sub>4</sub>tz (2)**.

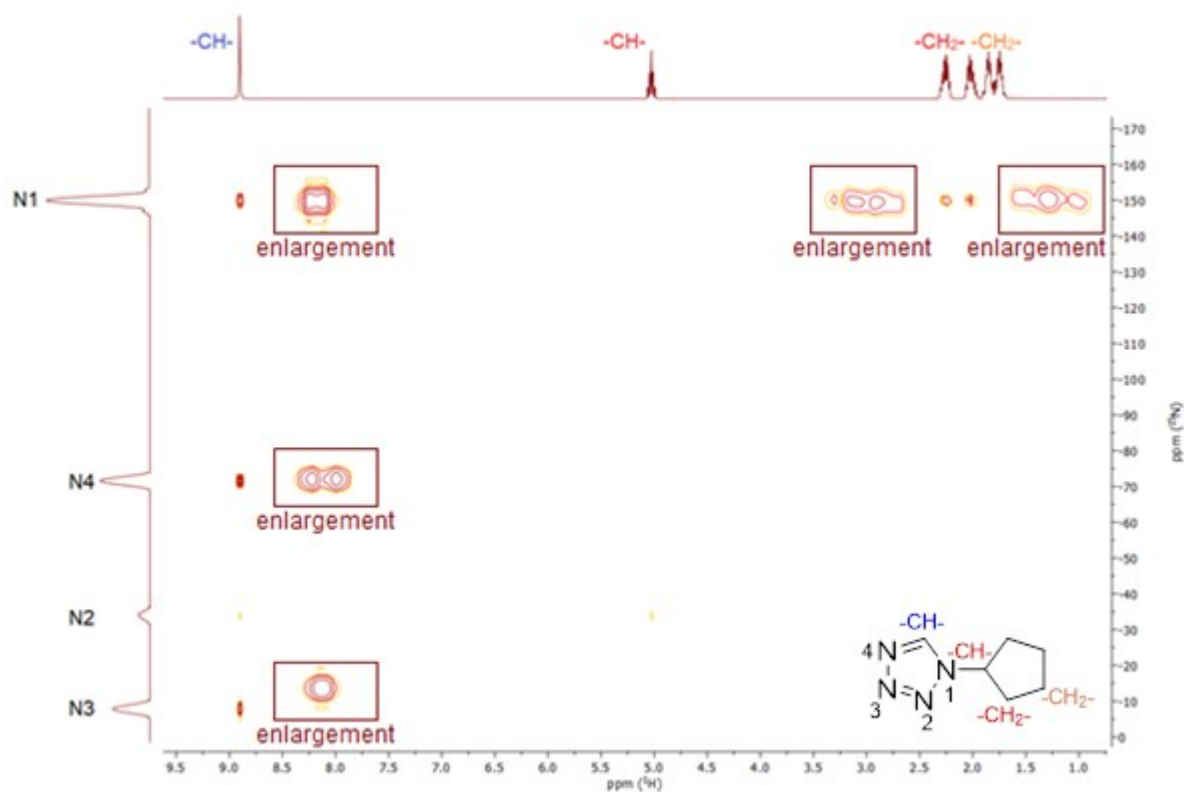

**Fig. S5**  $^1\text{H}$ - $^{15}\text{N}$ -HMBC NMR spectrum of ligand **C<sub>5</sub>tz (3)**.

### 3. X-ray Diffraction

For all crystalline compounds, an Oxford Xcalibur3 diffractometer with a CCD area detector or Bruker D8 Venture TXS diffractometer equipped with a multilayer monochromator, a Photon 2 detector and a rotating-anode generator were employed for data collection using Mo- $K\alpha$  radiation ( $\lambda = 0.7107 \text{ \AA}$ ). On the Oxford device, data collection and reduction were carried out using the CRYCALISPRO software.<sup>S1</sup> On the Bruker diffractometer, the data were collected with the Bruker Instrument Service v3.0.21, the data reduction was performed using the SAINT V8.18C software (Bruker AXS Inc., 2011). The structures were solved by direct methods (SIR-92,<sup>S2</sup> SIR-97,<sup>S3</sup> or SHELXS-97<sup>S4</sup>) and refined by full-matrix least-squares on  $F^2$  (SHELXL<sup>S4</sup>) and finally checked using the PLATON software<sup>S5</sup> integrated in the WinGX<sup>S6</sup> software suite. The non-hydrogen atoms were refined anisotropically. The absorptions were corrected by a SCALE3 ABSPACK or SADABS Bruker APEX3 multiscan method.<sup>S7,8</sup> All DIAMOND2 plots are shown with thermal ellipsoids at the 50% probability level and hydrogen atoms are shown as small spheres of arbitrary radius.

**Table S1** Crystallographic data of **1**, and **4–6**.

|                                                | <b>1</b>                                     | <b>4</b>                                                                        | <b>5</b>                                                                        | <b>6</b>                                                         |
|------------------------------------------------|----------------------------------------------|---------------------------------------------------------------------------------|---------------------------------------------------------------------------------|------------------------------------------------------------------|
| Formula                                        | C <sub>4</sub> H <sub>6</sub> N <sub>4</sub> | C <sub>16</sub> H <sub>24</sub> Cu <sub>2</sub> N <sub>20</sub> O <sub>12</sub> | C <sub>32</sub> H <sub>52</sub> Cu <sub>2</sub> N <sub>36</sub> O <sub>14</sub> | C <sub>15</sub> H <sub>24</sub> CuN <sub>14</sub> O <sub>6</sub> |
| FW [g mol <sup>-1</sup> ]                      | 110.13                                       | 815.63                                                                          | 1292.17                                                                         | 560.02                                                           |
| Crystal system                                 | monoclinic                                   | orthorhombic                                                                    | triclinic                                                                       | monoclinic                                                       |
| Space Group                                    | <i>P</i> 2 <sub>1</sub>                      | <i>Pna</i> 2 <sub>1</sub>                                                       | <i>P</i> -1                                                                     | <i>I</i> a                                                       |
| Colour / Habit                                 | colourless platelet                          | blue block                                                                      | blue block                                                                      | blue block                                                       |
| Size [mm]                                      | 0.14 x 0.49 x 0.50                           | 0.11 x 0.13 x 0.29                                                              | 0.25 x 0.30 x 0.50                                                              | 0.20 x 0.30 x 0.39                                               |
| <i>a</i> [Å]                                   | 4.9091(9)                                    | 19.4982(5)                                                                      | 11.2105(7)                                                                      | 10.4489(4)                                                       |
| <i>b</i> [Å]                                   | 6.6220(8)                                    | 15.0587(5)                                                                      | 11.3324(8)                                                                      | 13.0298(5)                                                       |
| <i>c</i> [Å]                                   | 8.103(2)                                     | 20.7916(5)                                                                      | 11.4691(7)                                                                      | 17.6353(7)                                                       |
| $\alpha$ [°]                                   | 90                                           | 90                                                                              | 104.328(6)                                                                      | 90                                                               |
| $\beta$ [°]                                    | 99.75(2)                                     | 90                                                                              | 106.897(5)                                                                      | 102.235(4)                                                       |
| $\gamma$ [°]                                   | 90                                           | 90                                                                              | 91.541(5)                                                                       | 90                                                               |
| <i>V</i> [Å <sup>3</sup> ]                     | 259.61(9)                                    | 6104.8(3)                                                                       | 1343.09(16)                                                                     | 2346.46(16)                                                      |
| <i>Z</i>                                       | 2                                            | 8                                                                               | 1                                                                               | 4                                                                |
| $\rho_{\text{calc}}$ [g cm <sup>-3</sup> ]     | 1.409                                        | 1.775                                                                           | 1.598                                                                           | 1.585                                                            |
| $\mu$ [mm <sup>-1</sup> ]                      | 0.099                                        | 1.486                                                                           | 0.888                                                                           | 0.995                                                            |
| <i>F</i> (000)                                 | 116                                          | 3312                                                                            | 666                                                                             | 1156                                                             |
| $\lambda_{\text{MoK}\alpha}$ [Å]               | 0.71073                                      | 0.71073                                                                         | 0.71073                                                                         | 0.71073                                                          |
| <i>T</i> [K]                                   | 112                                          | 110                                                                             | 113                                                                             | 105                                                              |
| $\theta$ Min–Max [°]                           | 4.0, 30.5                                    | 2.5, 32.3                                                                       | 1.9, 26.4                                                                       | 2.0, 30.5                                                        |
| Dataset                                        | –6: 6; –9: 9; –11: 9                         | –29: 29; –21: 21;<br>–30: 24                                                    | –13: 14; –13: 14;<br>–11: 14                                                    | –14: 14; –18: 18;<br>–25: 25                                     |
| Reflections collected                          | 2494                                         | 56214                                                                           | 7859                                                                            | 23149                                                            |
| Independent refl.                              | 1571                                         | 18817                                                                           | 5412                                                                            | 7161                                                             |
| <i>R</i> <sub>int</sub>                        | 0.024                                        | 0.086                                                                           | 0.024                                                                           | 0.033                                                            |
| Observed reflections                           | 1319                                         | 12571                                                                           | 4547                                                                            | 6720                                                             |
| Parameters                                     | 97                                           | 902                                                                             | 483                                                                             | 422                                                              |
| <i>R</i> <sub>1</sub> (obs) <sup>a</sup>       | 0.0434                                       | 0.0590                                                                          | 0.0359                                                                          | 0.0269                                                           |
| <i>wR</i> <sub>2</sub> (all data) <sup>b</sup> | 0.0941                                       | 0.1121                                                                          | 0.0880                                                                          | 0.0604                                                           |
| Goof <sup>c</sup>                              | 1.10                                         | 1.02                                                                            | 1.03                                                                            | 1.06                                                             |
| Resd. Dens. [e Å <sup>-3</sup> ]               | –0.21, 0.21                                  | –0.50, 0.77                                                                     | –0.35, 0.34                                                                     | –0.33, 0.42                                                      |
| Absorption correction                          | multi-scan                                   | multi-scan                                                                      | multi-scan                                                                      | multi-scan                                                       |
| CCDC                                           | 2061069                                      | 2061078                                                                         | 2061087                                                                         | 2061071                                                          |

a)  $R_1 = \sum ||F_o| - |F_c|| / \sum |F_o|$ ; b)  $wR_2 = [\sum [w(F_o^2 - F_c^2)^2] / \sum [w(F_o^2)]]^{1/2}$ ;  $w = [\sigma^2(F_o^2) + (xP)^2 + yP]^{-1}$  and  $P = (F_o^2 + 2F_c^2) / 3$ ; c)  $\text{Goof} = \{\sum [w(F_o^2 - F_c^2)^2] / (n-p)\}^{1/2}$  ( $n$  = number of reflections;  $p$  = total number of parameters).

**Table S2** Crystallographic data of **7–10**.

|                                                | <b>7</b>                                                         | <b>8</b>                                        | <b>9</b>                                        | <b>10</b>                                                       |
|------------------------------------------------|------------------------------------------------------------------|-------------------------------------------------|-------------------------------------------------|-----------------------------------------------------------------|
| Formula                                        | C <sub>12</sub> H <sub>20</sub> CuN <sub>10</sub> O <sub>6</sub> | C <sub>4</sub> H <sub>6</sub> CuN <sub>10</sub> | C <sub>5</sub> H <sub>8</sub> CuN <sub>10</sub> | C <sub>12</sub> H <sub>20</sub> Cu <sub>2</sub> N <sub>20</sub> |
| FW [g mol <sup>-1</sup> ]                      | 463.92                                                           | 257.73                                          | 271.75                                          | 571.56                                                          |
| Crystal system                                 | monoclinic                                                       | triclinic                                       | monoclinic                                      | triclinic                                                       |
| Space Group                                    | <i>P</i> 2 <sub>1</sub> / <i>c</i>                               | <i>P</i> -1                                     | <i>P</i> 2 <sub>1</sub> / <i>c</i>              | <i>P</i> -1                                                     |
| Colour / Habit                                 | blue plate                                                       | brown block                                     | brown platelet                                  | brown plate                                                     |
| Size [mm]                                      | 0.06 x 0.32 x 0.50                                               | 0.03 x 0.03 x 0.04                              | 0.02 x 0.24 x 0.40                              | 0.02 x 0.10 x 0.30                                              |
| <i>a</i> [Å]                                   | 14.4782(13)                                                      | 5.5870(3)                                       | 15.1598(14)                                     | 6.2935(15)                                                      |
| <i>b</i> [Å]                                   | 6.3738(3)                                                        | 6.9121(4)                                       | 6.2457(3)                                       | 10.817(2)                                                       |
| <i>c</i> [Å]                                   | 9.7644(5)                                                        | 13.0900(7)                                      | 10.8574(5)                                      | 16.387(3)                                                       |
| $\alpha$ [°]                                   | 90                                                               | 96.426(2)                                       | 90                                              | 75.106(16)                                                      |
| $\beta$ [°]                                    | 92.052(6)                                                        | 99.436(2)                                       | 102.305(6)                                      | 82.860(18)                                                      |
| $\gamma$ [°]                                   | 90                                                               | 110.441(2)                                      | 90                                              | 89.884(17)                                                      |
| <i>V</i> [Å <sup>3</sup> ]                     | 900.49(10)                                                       | 459.38(4)                                       | 1004.40(12)                                     | 1069.2(4)                                                       |
| <i>Z</i>                                       | 2                                                                | 2                                               | 4                                               | 2                                                               |
| $\rho_{\text{calc}}$ [g cm <sup>-3</sup> ]     | 1.711                                                            | 1.863                                           | 1.797                                           | 1.775                                                           |
| $\mu$ [mm <sup>-1</sup> ]                      | 1.271                                                            | 2.362                                           | 2.166                                           | 2.039                                                           |
| <i>F</i> (000)                                 | 478                                                              | 258                                             | 548                                             | 580                                                             |
| $\lambda_{\text{MoK}\alpha}$ [Å]               | 0.71073                                                          | 0.71073                                         | 0.71073                                         | 0.71073                                                         |
| <i>T</i> [K]                                   | 105                                                              | 102                                             | 106                                             | 112                                                             |
| $\theta$ Min–Max [°]                           | 2.8, 26.4                                                        | 3.2, 26.4                                       | 2.8, 26.4                                       | 2.6, 26.4                                                       |
| Dataset                                        | -17: 18; -5: 7;<br>-12: 11                                       | -6: 6; -8: 8; -16: 16                           | -18: 18; -7: 7;<br>-13: 13                      | -7: 7; -12: 13;<br>-15: 20                                      |
| Reflections collected                          | 4777                                                             | 9544                                            | 6720                                            | 6103                                                            |
| Independent refl.                              | 1833                                                             | 1867                                            | 2055                                            | 4320                                                            |
| <i>R</i> <sub>int</sub>                        | 0.054                                                            | 0.037                                           | 0.056                                           | 0.064                                                           |
| Observed reflections                           | 1429                                                             | 1760                                            | 1547                                            | 2317                                                            |
| Parameters                                     | 173                                                              | 160                                             | 145                                             | 307                                                             |
| <i>R</i> <sub>1</sub> (obs) <sup>a</sup>       | 0.0506                                                           | 0.0190                                          | 0.0450                                          | 0.0778                                                          |
| <i>wR</i> <sub>2</sub> (all data) <sup>b</sup> | 0.1371                                                           | 0.0470                                          | 0.1066                                          | 0.1643                                                          |
| Goof <sup>c</sup>                              | 1.05                                                             | 1.04                                            | 1.06                                            | 0.99                                                            |
| Resd. Dens. [e Å <sup>-3</sup> ]               | -0.84, 1.26                                                      | -0.30, 0.39                                     | -0.55, 1.46                                     | -0.70, 1.46                                                     |
| Absorption correction                          | multi-scan                                                       | multi-scan                                      | multi-scan                                      | multi-scan                                                      |
| CCDC                                           | 2061075                                                          | 2061086                                         | 2061084                                         | 2061085                                                         |

a)  $R_1 = \sum ||F_o| - |F_c|| / \sum |F_o|$ ; b)  $wR_2 = [\sum [w(F_o^2 - F_c^2)^2] / \sum [w(F_o^2)]]^{1/2}$ ;  $w = [\sigma^2(F_o^2) + (xP)^2 + yP]^{-1}$  and  $P = (F_o^2 + 2F_c^2) / 3$ ; c) Goof =  $\{\sum [w(F_o^2 - F_c^2)^2] / (n-p)\}^{1/2}$  ( $n$  = number of reflections;  $p$  = total number of parameters).



**Table S3** Crystallographic data of **11–14**.

|                                                | <b>11</b>                                                                        | <b>12</b>                                                                        | <b>13</b>                                                                        | <b>14</b>                                                                        |
|------------------------------------------------|----------------------------------------------------------------------------------|----------------------------------------------------------------------------------|----------------------------------------------------------------------------------|----------------------------------------------------------------------------------|
| Formula                                        | C <sub>24</sub> H <sub>36</sub> Cl <sub>2</sub> CuN <sub>24</sub> O <sub>6</sub> | C <sub>20</sub> H <sub>32</sub> Cl <sub>2</sub> CuN <sub>16</sub> O <sub>6</sub> | C <sub>24</sub> H <sub>40</sub> Cl <sub>2</sub> CuN <sub>16</sub> O <sub>6</sub> | C <sub>24</sub> H <sub>36</sub> Cl <sub>2</sub> MnN <sub>24</sub> O <sub>8</sub> |
| FW [g mol <sup>-1</sup> ]                      | 891.21                                                                           | 727.05                                                                           | 783.16                                                                           | 914.61                                                                           |
| Crystal system                                 | trigonal                                                                         | monoclinic                                                                       | monoclinic                                                                       | trigonal                                                                         |
| Space Group                                    | <i>R</i> -3                                                                      | <i>P</i> 2 <sub>1</sub> / <i>c</i>                                               | <i>I</i> 2/ <i>a</i>                                                             | <i>R</i> -3                                                                      |
| Colour / Habit                                 | blue platelet                                                                    | blue plate                                                                       | blue block                                                                       | colourless plate                                                                 |
| Size [mm]                                      | 0.11 x 0.24 x 0.27                                                               | 0.15 x 0.41 x 0.76                                                               | 0.22 x 0.54 x 0.56                                                               | 0.14 x 0.59 x 0.64                                                               |
| <i>a</i> [Å]                                   | 10.9182(10)                                                                      | 6.7946(4)                                                                        | 21.6878(12)                                                                      | 10.8880(6)                                                                       |
| <i>b</i> [Å]                                   | 10.9182(10)                                                                      | 18.1424(12)                                                                      | 6.4701(5)                                                                        | 10.8880(6)                                                                       |
| <i>c</i> [Å]                                   | 28.166(3)                                                                        | 12.4720(7)                                                                       | 24.9341(13)                                                                      | 29.5174(17)                                                                      |
| $\alpha$ [°]                                   | 90                                                                               | 90                                                                               | 90                                                                               | 90                                                                               |
| $\beta$ [°]                                    | 90                                                                               | 96.844(6)                                                                        | 104.209(4)                                                                       | 90                                                                               |
| $\gamma$ [°]                                   | 120                                                                              | 90                                                                               | 90                                                                               | 120                                                                              |
| <i>V</i> [Å <sup>3</sup> ]                     | 2907.8(7)                                                                        | 1526.47(16)                                                                      | 3391.8(4)                                                                        | 3030.4(4)                                                                        |
| <i>Z</i>                                       | 3                                                                                | 2                                                                                | 4                                                                                | 3                                                                                |
| $\rho_{\text{calc}}$ [g cm <sup>-3</sup> ]     | 1.527                                                                            | 1.582                                                                            | 1.534                                                                            | 1.503                                                                            |
| $\mu$ [mm <sup>-1</sup> ]                      | 0.774                                                                            | 0.956                                                                            | 0.866                                                                            | 0.535                                                                            |
| <i>F</i> (000)                                 | 1377                                                                             | 750                                                                              | 1628                                                                             | 1413                                                                             |
| $\lambda_{\text{MoK}\alpha}$ [Å]               | 0.71073                                                                          | 0.71073                                                                          | 0.71073                                                                          | 0.71073                                                                          |
| <i>T</i> [K]                                   | 127                                                                              | 100                                                                              | 127                                                                              | 106                                                                              |
| $\theta$ Min–Max [°]                           | 2.3, 26.3                                                                        | 2.0, 26.4                                                                        | 2.2, 26.4                                                                        | 2.1, 26.3                                                                        |
| Dataset                                        | -13: 7; -12: 13;<br>-35: 35                                                      | -8: 8; -22: 22;<br>-15: 15                                                       | -26: 27; -8: 8;<br>-30: 31                                                       | -13: 13; -12: 11;<br>-13: 36                                                     |
| Reflections collected                          | 7265                                                                             | 10086                                                                            | 14134                                                                            | 2261                                                                             |
| Independent refl.                              | 1328                                                                             | 3135                                                                             | 3468                                                                             | 1385                                                                             |
| <i>R</i> <sub>int</sub>                        | 0.037                                                                            | 0.035                                                                            | 0.034                                                                            | 0.015                                                                            |
| Observed reflections                           | 1148                                                                             | 2587                                                                             | 3120                                                                             | 1240                                                                             |
| Parameters                                     | 111                                                                              | 269                                                                              | 223                                                                              | 114                                                                              |
| <i>R</i> <sub>1</sub> (obs) <sup>a</sup>       | 0.0299                                                                           | 0.0325                                                                           | 0.0304                                                                           | 0.0293                                                                           |
| <i>wR</i> <sub>2</sub> (all data) <sup>b</sup> | 0.0797                                                                           | 0.0774                                                                           | 0.0794                                                                           | 0.0768                                                                           |
| Goof <sup>c</sup>                              | 1.06                                                                             | 1.01                                                                             | 1.06                                                                             | 1.08                                                                             |
| Resd. Dens. [e Å <sup>-3</sup> ]               | -0.25, 0.32                                                                      | -0.29, 0.38                                                                      | -0.29, 0.34                                                                      | -0.32, 0.33                                                                      |
| Absorption correction                          | multi-scan                                                                       | multi-scan                                                                       | multi-scan                                                                       | multi-scan                                                                       |
| CCDC                                           | 2061081                                                                          | 2061079                                                                          | 2061076                                                                          | 2061073                                                                          |

a)  $R_1 = \sum ||F_o| - |F_c|| / \sum |F_o|$ ; b)  $wR_2 = [\sum [w(F_o^2 - F_c^2)^2] / \sum [w(F_o^2)]]^{1/2}$ ;  $w = [\sigma^2(F_o^2) + (xP)^2 + yP]^{-1}$  and  $P = (F_o^2 + 2F_c^2) / 3$ ; c) Goof =  $\{\sum [w(F_o^2 - F_c^2)^2] / (n-p)\}^{1/2}$  ( $n$  = number of reflections;  $p$  = total number of parameters).

**Table S4** Crystallographic data of **15a**, **15b**, and **16**.

|                                                | <b>15a</b>                                                                       | <b>15b</b>                                                                       | <b>16</b>                                                                        |
|------------------------------------------------|----------------------------------------------------------------------------------|----------------------------------------------------------------------------------|----------------------------------------------------------------------------------|
| Formula                                        | C <sub>24</sub> H <sub>36</sub> Cl <sub>2</sub> FeN <sub>24</sub> O <sub>8</sub> | C <sub>24</sub> H <sub>36</sub> Cl <sub>2</sub> FeN <sub>24</sub> O <sub>8</sub> | C <sub>24</sub> H <sub>36</sub> Cl <sub>2</sub> CuN <sub>24</sub> O <sub>8</sub> |
| FW [g mol <sup>-1</sup> ]                      | 915.52                                                                           | 915.52                                                                           | 923.21                                                                           |
| Crystal system                                 | trigonal                                                                         | trigonal                                                                         | trigonal                                                                         |
| Space Group                                    | R-3                                                                              | R-3                                                                              | R-3                                                                              |
| Colour / Habit                                 | violet block                                                                     | colourless block                                                                 | blue hexagon                                                                     |
| Size [mm]                                      | 0.15 x 0.20 x 0.22                                                               | 0.20 x 0.20 x 0.20                                                               | 0.05 x 0.37 x 0.46                                                               |
| <i>a</i> [Å]                                   | 10.7309(7)                                                                       | 10.8393(1)                                                                       | 10.7417(15)                                                                      |
| <i>b</i> [Å]                                   | 10.7309(7)                                                                       | 10.8393(1)                                                                       | 10.7417(15)                                                                      |
| <i>c</i> [Å]                                   | 29.207(2)                                                                        | 30.1945(6)                                                                       | 29.826(5)                                                                        |
| $\alpha$ [°]                                   | 90                                                                               | 90                                                                               | 90                                                                               |
| $\beta$ [°]                                    | 90                                                                               | 90                                                                               | 90                                                                               |
| $\gamma$ [°]                                   | 120                                                                              | 120                                                                              | 120                                                                              |
| <i>V</i> [Å <sup>3</sup> ]                     | 2912.7(5)                                                                        | 3072.28(10)                                                                      | 2980.4(11)                                                                       |
| <i>Z</i>                                       | 3                                                                                | 3                                                                                | 3                                                                                |
| $\rho_{\text{calc}}$ [g cm <sup>-3</sup> ]     | 1.566                                                                            | 1.485                                                                            | 1.543                                                                            |
| $\mu$ [mm <sup>-1</sup> ]                      | 0.605                                                                            | 0.574                                                                            | 0.761                                                                            |
| <i>F</i> (000)                                 | 1416                                                                             | 1416                                                                             | 1425                                                                             |
| $\lambda_{\text{MoK}\alpha}$ [Å]               | 0.71073                                                                          | 0.71073                                                                          | 0.71073                                                                          |
| <i>T</i> [K]                                   | 107                                                                              | 297                                                                              | 115                                                                              |
| $\theta$ Min–Max [°]                           | 2.3, 26.4                                                                        | 2.6, 26.3                                                                        | 2.0, 26.4                                                                        |
| Dataset                                        | –13: 12; –13: 13; –36: 36                                                        | –13: 13; –13: 13; –37: 37                                                        | –13: 13; –13: 13; –33: 37                                                        |
| Reflections collected                          | 5417                                                                             | 19341                                                                            | 7345                                                                             |
| Independent refl.                              | 1341                                                                             | 1401                                                                             | 1363                                                                             |
| <i>R</i> <sub>int</sub>                        | 0.031                                                                            | 0.022                                                                            | 0.060                                                                            |
| Observed reflections                           | 1169                                                                             | 1328                                                                             | 1124                                                                             |
| Parameters                                     | 114                                                                              | 107                                                                              | 90                                                                               |
| <i>R</i> <sub>1</sub> (obs) <sup>a</sup>       | 0.0298                                                                           | 0.0662                                                                           | 0.0405                                                                           |
| <i>wR</i> <sub>2</sub> (all data) <sup>b</sup> | 0.0713                                                                           | 0.1712                                                                           | 0.0953                                                                           |
| Goof <sup>c</sup>                              | 1.05                                                                             | 1.16                                                                             | 1.06                                                                             |
| Resd. Dens. [e Å <sup>-3</sup> ]               | –0.32, 0.34                                                                      | –0.67, 0.93                                                                      | –0.25, 0.46                                                                      |
| Absorption correction                          | multi-scan                                                                       | multi-scan                                                                       | multi-scan                                                                       |
| CCDC                                           | 2061074                                                                          | 2061089                                                                          | 2061072                                                                          |

a)  $R_1 = \sum(|F_o| - |F_c|) / \sum|F_o|$ ; b)  $wR_2 = [\sum[w(F_o^2 - F_c^2)^2] / \sum[w(F_o^2)]]^{1/2}$ ;  $w = [\sigma^2(F_o^2) + (xP)^2 + yP]^{-1}$  and  $P = (F_o^2 + 2F_c^2) / 3$ ; c)  $\text{Goof} = \{\sum[w(F_o^2 - F_c^2)^2] / (n-p)\}^{1/2}$  (*n* = number of reflections; *p* = total number of parameters).

**Table S5** Crystallographic data of 17–19.

|                                                | 17                                                                                | 18                                                                                              | 19                                                                                              |
|------------------------------------------------|-----------------------------------------------------------------------------------|-------------------------------------------------------------------------------------------------|-------------------------------------------------------------------------------------------------|
| Formula                                        | C <sub>24</sub> H <sub>36</sub> Cl <sub>2</sub> N <sub>24</sub> O <sub>8</sub> Zn | C <sub>40</sub> H <sub>68</sub> Cl <sub>4</sub> Cu <sub>2</sub> N <sub>32</sub> O <sub>18</sub> | C <sub>48</sub> H <sub>84</sub> Cl <sub>4</sub> Cu <sub>2</sub> N <sub>32</sub> O <sub>18</sub> |
| FW [g mol <sup>-1</sup> ]                      | 925.04                                                                            | 1554.14                                                                                         | 1666.35                                                                                         |
| Crystal system                                 | trigonal                                                                          | monoclinic                                                                                      | triclinic                                                                                       |
| Space Group                                    | <i>R</i> -3                                                                       | <i>P</i> 2 <sub>1</sub> / <i>n</i>                                                              | <i>P</i> -1                                                                                     |
| Colour / Habit                                 | colourless plate                                                                  | blue block                                                                                      | blue block                                                                                      |
| Size [mm]                                      | 0.17 x 0.21 x 0.40                                                                | 0.09 x 0.11 x 0.24                                                                              | 0.19 x 0.22 x 0.43                                                                              |
| <i>a</i> [Å]                                   | 10.7815(5)                                                                        | 17.0836(7)                                                                                      | 11.0187(5)                                                                                      |
| <i>b</i> [Å]                                   | 10.7815(5)                                                                        | 11.1197(5)                                                                                      | 12.6481(8)                                                                                      |
| <i>c</i> [Å]                                   | 29.5910(18)                                                                       | 17.2721(9)                                                                                      | 13.4478(8)                                                                                      |
| $\alpha$ [°]                                   | 90                                                                                | 90                                                                                              | 86.257(5)                                                                                       |
| $\beta$ [°]                                    | 90                                                                                | 93.681(4)                                                                                       | 73.006(5)                                                                                       |
| $\gamma$ [°]                                   | 120                                                                               | 90                                                                                              | 82.596(5)                                                                                       |
| <i>V</i> [Å <sup>3</sup> ]                     | 2978.9(4)                                                                         | 3274.3(3)                                                                                       | 1776.63(18)                                                                                     |
| <i>Z</i>                                       | 3                                                                                 | 2                                                                                               | 1                                                                                               |
| $\rho_{\text{calc}}$ [g cm <sup>-3</sup> ]     | 1.547                                                                             | 1.576                                                                                           | 1.558                                                                                           |
| $\mu$ [mm <sup>-1</sup> ]                      | 0.830                                                                             | 0.903                                                                                           | 0.838                                                                                           |
| <i>F</i> (000)                                 | 1428                                                                              | 1604                                                                                            | 866                                                                                             |
| $\lambda_{\text{MoK}\alpha}$ [Å]               | 0.71073                                                                           | 0.71073                                                                                         | 0.71073                                                                                         |
| <i>T</i> [K]                                   | 107                                                                               | 111                                                                                             | 103                                                                                             |
| $\theta$ Min–Max [°]                           | 3.5, 26.4                                                                         | 2.2, 26.4                                                                                       | 1.9, 32.3                                                                                       |
| Dataset                                        | –11: 13; –13: 13; –33: 36                                                         | –17: 21; –13: 13; –18: 21                                                                       | –14: 15; –17: 18; –20: 20                                                                       |
| Reflections collected                          | 6902                                                                              | 18424                                                                                           | 20438                                                                                           |
| Independent refl.                              | 1362                                                                              | 6677                                                                                            | 11483                                                                                           |
| <i>R</i> <sub>int</sub>                        | 0.067                                                                             | 0.070                                                                                           | 0.034                                                                                           |
| Observed reflections                           | 1081                                                                              | 4331                                                                                            | 8487                                                                                            |
| Parameters                                     | 114                                                                               | 472                                                                                             | 617                                                                                             |
| <i>R</i> <sub>1</sub> (obs) <sup>a</sup>       | 0.0383                                                                            | 0.0579                                                                                          | 0.0499                                                                                          |
| <i>wR</i> <sub>2</sub> (all data) <sup>b</sup> | 0.0852                                                                            | 0.1217                                                                                          | 0.1416                                                                                          |
| Goof <sup>c</sup>                              | 1.01                                                                              | 1.01                                                                                            | 1.07                                                                                            |
| Resd. Dens. [e Å <sup>-3</sup> ]               | –0.31, 0.47                                                                       | –0.40, 0.54                                                                                     | –0.52, 0.68                                                                                     |
| Absorption correction                          | multi-scan                                                                        | multi-scan                                                                                      | multi-scan                                                                                      |
| CCDC                                           | 2061077                                                                           | 2061080                                                                                         | 2061070                                                                                         |

a)  $R_1 = \sum ||F_o| - |F_c|| / \sum |F_o|$ ; b)  $wR_2 = [\sum [w(F_o^2 - F_c^2)^2] / \sum [w(F_o^2)]]^{1/2}$ ;  $w = [\sigma^2(F_o^2) + (xP)^2 + yP]^{-1}$  and  $P = (F_o^2 + 2F_c^2) / 3$ ; c)  $\text{Goof} = \{\sum [w(F_o^2 - F_c^2)^2] / (n-p)\}^{1/2}$  ( $n$  = number of reflections;  $p$  = total number of parameters).

**Table S6** Crystallographic data of **20–22**.

|                                                 | <b>20</b>                                                                         | <b>21</b>                                                                         | <b>22</b>                                                                         |
|-------------------------------------------------|-----------------------------------------------------------------------------------|-----------------------------------------------------------------------------------|-----------------------------------------------------------------------------------|
| Formula                                         | C <sub>24</sub> H <sub>44</sub> Cl <sub>2</sub> MnN <sub>16</sub> O <sub>10</sub> | C <sub>24</sub> H <sub>44</sub> Cl <sub>2</sub> FeN <sub>16</sub> O <sub>10</sub> | C <sub>24</sub> H <sub>44</sub> Cl <sub>2</sub> ZnN <sub>16</sub> O <sub>10</sub> |
| FW [g mol <sup>-1</sup> ]                       | 842.59                                                                            | 842.49                                                                            | 853.02                                                                            |
| Crystal system                                  | triclinic                                                                         | triclinic                                                                         | triclinic                                                                         |
| Space Group                                     | <i>P</i> -1                                                                       | <i>P</i> -1                                                                       | <i>P</i> -1                                                                       |
| Colour / Habit                                  | colourless block                                                                  | colourless block                                                                  | colourless block                                                                  |
| Size [mm]                                       | 0.30 x 0.40 x 0.40                                                                | 0.15 x 0.40 x 0.40                                                                | 0.12 x 0.30 x 0.35                                                                |
| <i>a</i> [Å]                                    | 10.7162(4)                                                                        | 10.9841(4)                                                                        | 10.9914(8)                                                                        |
| <i>b</i> [Å]                                    | 11.9386(6)                                                                        | 11.8637(5)                                                                        | 11.9384(9)                                                                        |
| <i>c</i> [Å]                                    | 15.5566(7)                                                                        | 15.0067(9)                                                                        | 14.9946(11)                                                                       |
| $\alpha$ [°]                                    | 68.044(4)                                                                         | 112.565(5)                                                                        | 112.552(7)                                                                        |
| $\beta$ [°]                                     | 79.661(4)                                                                         | 90.518(4)                                                                         | 90.350(6)                                                                         |
| $\gamma$ [°]                                    | 77.005(4)                                                                         | 96.245(3)                                                                         | 96.674(6)                                                                         |
| <i>V</i> [Å <sup>3</sup> ]                      | 1788.58(15)                                                                       | 1792.38(16)                                                                       | 1802.1(3)                                                                         |
| <i>Z</i>                                        | 2                                                                                 | 1                                                                                 | 2                                                                                 |
| $\rho_{\text{calc}}$ [g cm <sup>-3</sup> ]      | 1.565                                                                             | 1.561                                                                             | 1.572                                                                             |
| $\mu$ [mm <sup>-1</sup> ]                       | 0.595                                                                             | 0.646                                                                             | 0.905                                                                             |
| <i>F</i> (000)                                  | 878                                                                               | 878                                                                               | 888                                                                               |
| $\lambda_{\text{MoK}\alpha}$ [Å]                | 0.71073                                                                           | 0.71073                                                                           | 0.71073                                                                           |
| <i>T</i> [K]                                    | 106                                                                               | 109                                                                               | 101                                                                               |
| $\theta$ Min–Max [°]                            | 2.0, 28.3                                                                         | 1.9, 30.9                                                                         | 1.9, 26.4                                                                         |
| Dataset                                         | –8: 13; –15: 15; –19: 20                                                          | –15: 15; –16: 17; –20: 21                                                         | –13: 13; –14: 14; –18: 18                                                         |
| Reflections collected                           | 12525                                                                             | 19528                                                                             | 16058                                                                             |
| Independent refl.                               | 7870                                                                              | 9842                                                                              | 7369                                                                              |
| <i>R</i> <sub>int</sub>                         | 0.023                                                                             | 0.034                                                                             | 0.052                                                                             |
| Observed reflections                            | 6124                                                                              | 7128                                                                              | 5411                                                                              |
| Parameters                                      | 497                                                                               | 518                                                                               | 493                                                                               |
| <i>R</i> <sub>1</sub> (obs) <sup>a</sup>        | 0.0572                                                                            | 0.0623                                                                            | 0.0665                                                                            |
| w <i>R</i> <sub>2</sub> (all data) <sup>b</sup> | 0.1514                                                                            | 0.1709                                                                            | 0.1950                                                                            |
| Goof <sup>c</sup>                               | 1.03                                                                              | 1.04                                                                              | 1.04                                                                              |
| Resd. Dens. [e Å <sup>-3</sup> ]                | –0.92, 1.72                                                                       | –0.72, 1.72                                                                       | –1.02, 1.70                                                                       |
| Absorption correction                           | multi-scan                                                                        | multi-scan                                                                        | multi-scan                                                                        |
| CCDC                                            | 2061082                                                                           | 2061088                                                                           | 2061083                                                                           |

a)  $R_1 = \sum(|F_o| - |F_c|) / \sum|F_o|$ ; b)  $wR_2 = [\sum[w(F_o^2 - F_c^2)^2] / \sum[w(F_o^2)]]^{1/2}$ ;  $w = [\sigma^2(F_o^2) + (xP)^2 + yP]^{-1}$  and  $P = (F_o^2 + 2F_c^2) / 3$ ; c)  $\text{Goof} = \{\sum[w(F_o^2 - F_c^2)^2] / (n-p)\}^{1/2}$  ( $n$  = number of reflections;  $p$  = total number of parameters).

**Table S7** Comparison of geometric parameters [ $\text{\AA}$ ,  $^\circ$ ] of **1** and cyclopropylamine.

| 1-cyclopropyl-5H-tetrazole | cyclopropylamine   |
|----------------------------|--------------------|
| N1–C2 1.448(3)             | N1–C1 1.434        |
| C2–C3 1.493(4),            | C2–C3 1.490(3)     |
| C2–C4 1.491(4),            | C1–C3 1.489(4)     |
| C3–C4 1.500(4)             | C1–C2 1.500(3)     |
| N1–C2–C3 117.8(2)          | N1–C1–C2 116.2(2)  |
| N1–C2–C4 118.5(2)          | N1–C1–C3 117.0(2)  |
| C3–C2–C4 60.36(19)         | C3–C1–C2 60.48(15) |
| C2–C3–C4 59.76(18)         | C1–C2–C3 59.75(16) |
| C2–C4–C3 59.89(19)         | C1–C3–C2 59.78(15) |

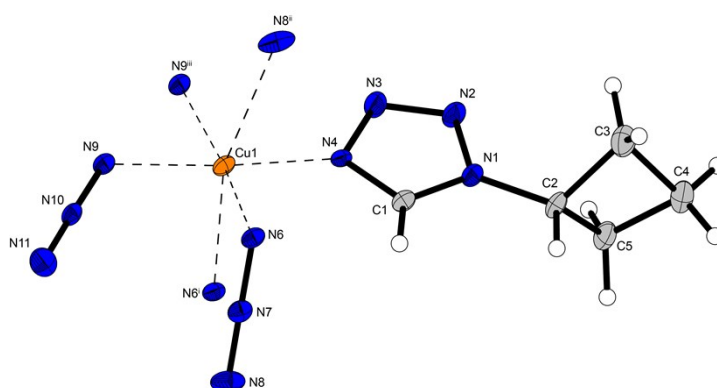

**Fig. S6** Coordination environment around the copper(II) centre in **9**. Selected bond lengths ( $\text{\AA}$ ): Cu1–N4 1.983(3), Cu1–N6 2.003(3), Cu1–N9 2.002(3), Cu1–N6<sup>i</sup> 2.520(3), Cu1–N8<sup>ii</sup> 2.686(3); select bond angles ( $^\circ$ ): N4–Cu1–N6 90.63(13), N4–Cu1–N9 175.23(13), N4–Cu1–N6<sup>i</sup> 87.47(12), N4–Cu1–N8<sup>ii</sup> 78.69(13), N6–Cu1–N9 93.63(13), N6–Cu1–N6<sup>i</sup> 90.43(12), N6–Cu1–N8<sup>ii</sup> 83.86(12), N8<sup>ii</sup>–Cu1–N9 99.63(12), N9–Cu1–N9<sup>iii</sup> 78.07(13), N6<sup>i</sup>–Cu1–N8<sup>ii</sup> 164.93(11). Symmetry codes: (i)  $-x, -0.5+y, 0.5-z$ , (ii)  $-x, 0.5+y, 0.5-z$ , (iii)  $-x, -y, -z$ .

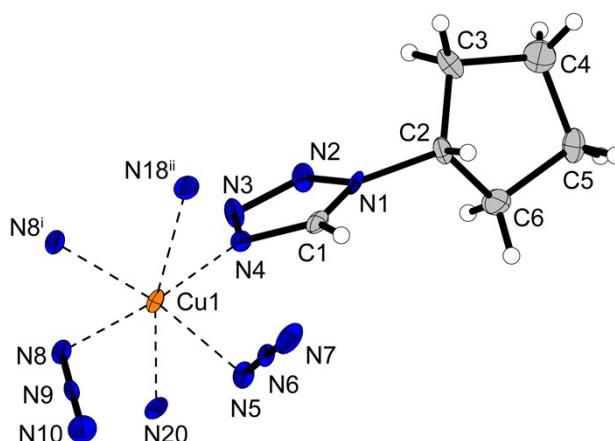

**Fig. S7** Coordination environment around the copper(II) centre in **10**. Selected bond lengths ( $\text{\AA}$ ): Cu1–N4 1.975(8), Cu1–N5 2.022(8), Cu1–N8 1.994(8), Cu1–N20 2.579(7); select bond angles ( $^\circ$ ): N4–Cu1–N5 91.1(3), N4–Cu1–N8 174.3(3), N4–Cu1–N20 85.4(3), N5–Cu1–N8 94.2(3), N5–Cu1–N20 85.2(3), N8–Cu1–N20 97.0(3).

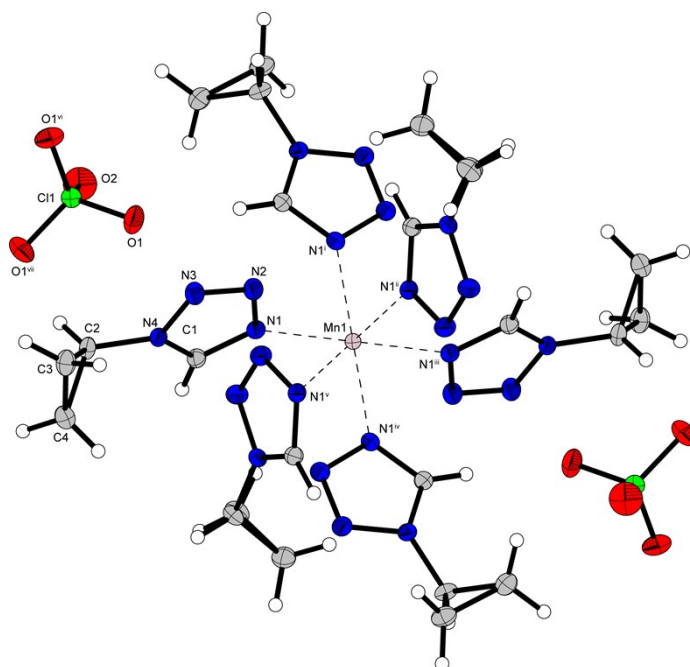

**Fig. S8** Molecular unit of **14**. Selected bond length (Å): Mn1–N1 2.2461(15); select bond angles (°): N1–Mn1–N1<sup>i</sup> 90.36(5), N1–Mn1–N1<sup>ii</sup> 90.36(6), N1–Mn1–N1<sup>iii</sup> 180.00, N1–Mn1–N1<sup>iv</sup> 89.64(5). Symmetry codes: (i) 0.33333+y, 0.66667–x+y, 0.66667–z, (ii) 1–x+y, 1–x, z, (iii) 1.33333–x, 0.66667–y, 0.66667–z, (iv) 1–y, x–y, z, (v) 0.33333+x–y, –0.33333+x, 0.66667–z.

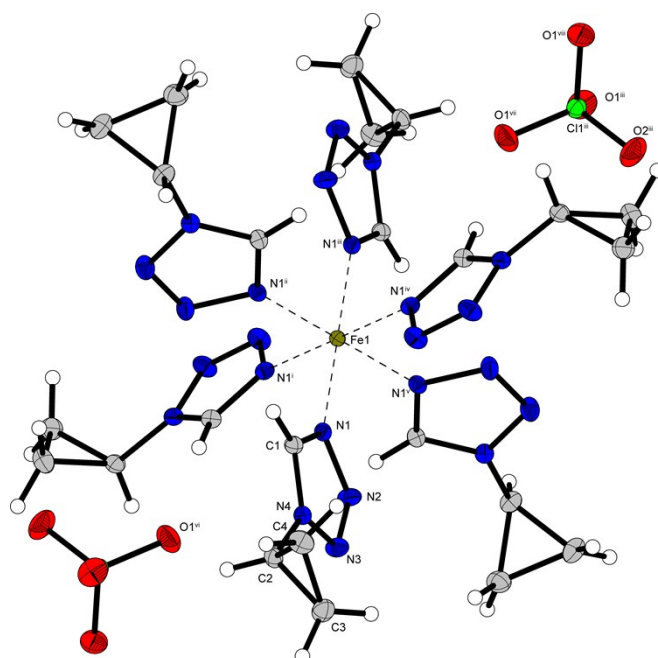

**Fig. S9** Molecular unit of **15a** at 107 K. Selected bond length (Å): Fe1–N1 2.0055(15); select bond angles (°): N1–Fe1–N1<sup>i</sup> 90.11(7), N1–Fe1–N1<sup>ii</sup> 90.11(6), N1–Fe1–N1<sup>iii</sup> 180.00, N1–Fe1–N1<sup>iv</sup> 89.89(7). Symmetry codes: (i) y, 1–x+y, 1–z, (ii) 1+x–y, x, 1–z, (iii) 2–x, 2–y, 1–z, (iv) 2–y, 1+x–y, z, (v) 1–x+y, 2–x, z.

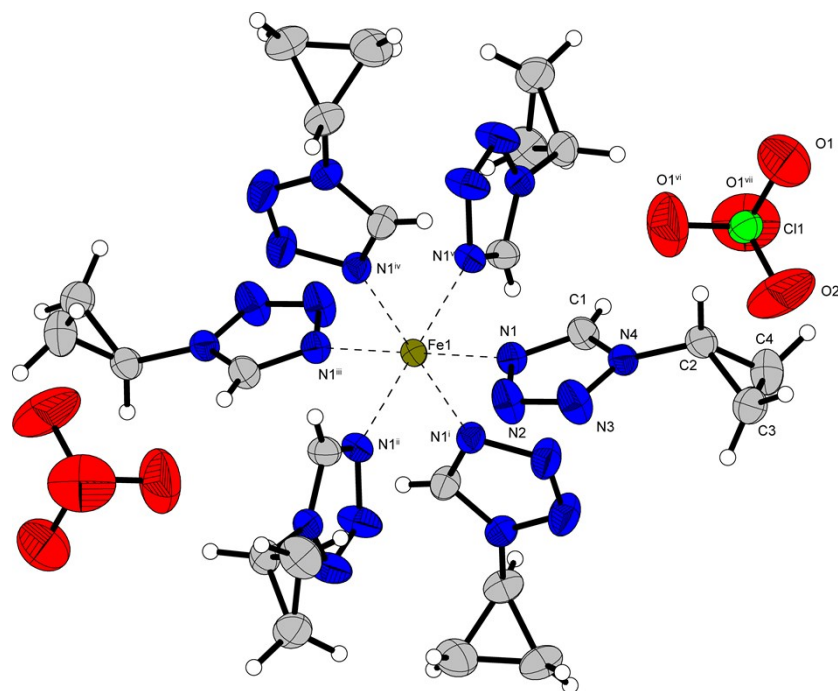

**Fig. S10** Molecular unit of **15b** at 297 K. Selected bond length (Å): Fe1–N1 2.190(2); select bond angles (°): N1–Fe1–N1<sup>i</sup> 89.82(9), N1–Fe1–N1<sup>ii</sup> 89.82(8), N1–Fe1–N1<sup>iii</sup> 180.00, N1–Fe1–N1<sup>iv</sup> 90.18(9). Symmetry codes: (i) 1–x+y, 2–x, z, (ii) 2–y, 1+x–y, z, (iii) 2–x, 2–y, 1–z, (iv) 1+x–y, x, 1–z, (v) y, 1–x+y, 1–z.

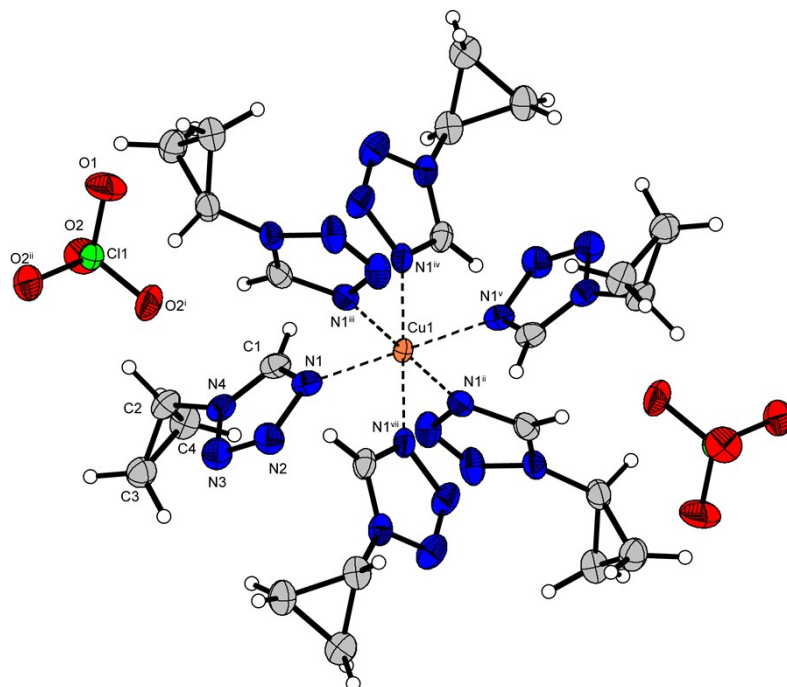

**Fig. S11** Molecular unit of **16**. Selected bond length (Å): Cu1–N1 2.128(2); select bond angles (°): N1–Cu1–N1<sup>i</sup> 90.05(9), N1–Cu1–N1<sup>iii</sup> 90.05(9), N1–Cu1–N1<sup>iv</sup> 180.00, N1–Cu1–N1<sup>v</sup> 89.95(9). Symmetry codes: (i) 1–y, x–y, z, (ii) –y, x–y, z, (iii) y, –x+y, 1–z, (iv) x–y, x, 1–z, (v) –x, –y, 1–z, (vi) –x+y, –x, z.

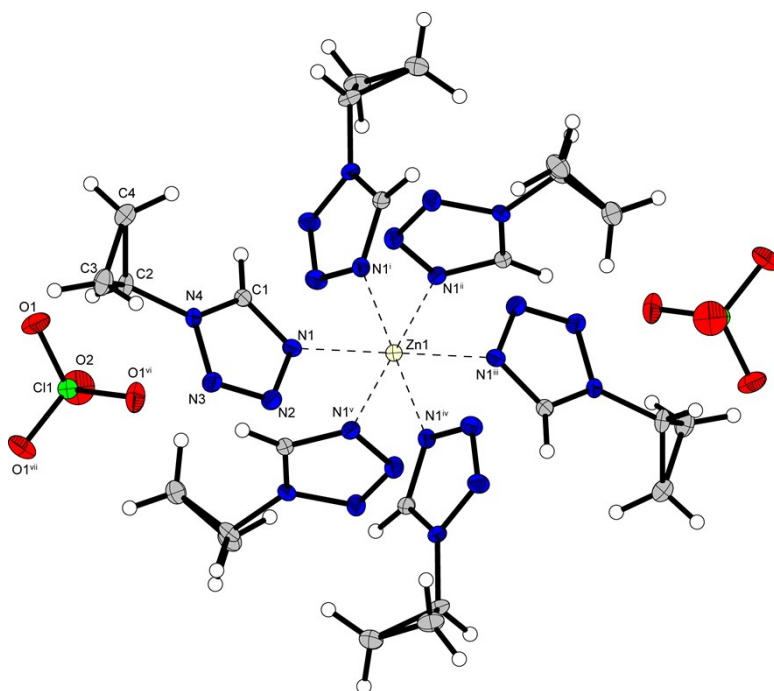

**Fig. S12** Molecular unit of **17**. Selected bond length (Å): Zn1–N1 2.159(2); select bond angles (°): N1–Zn1–N1<sup>i</sup> 90.17(9), N1–Zn1–N1<sup>ii</sup> 90.17(8), N1–Zn1–N1<sup>iii</sup> 180.00, N1–Zn1–N1<sup>iv</sup> 89.83(9). Symmetry codes: (i)  $y, 1-x+y, 1-z$ , (ii)  $1-x+y, 2-x, z$ , (iii)  $2-x, 2-y, 1-z$ , (iv)  $2-y, 1+x-y, z$ , (v)  $1+x-y, x, 1-z$ .

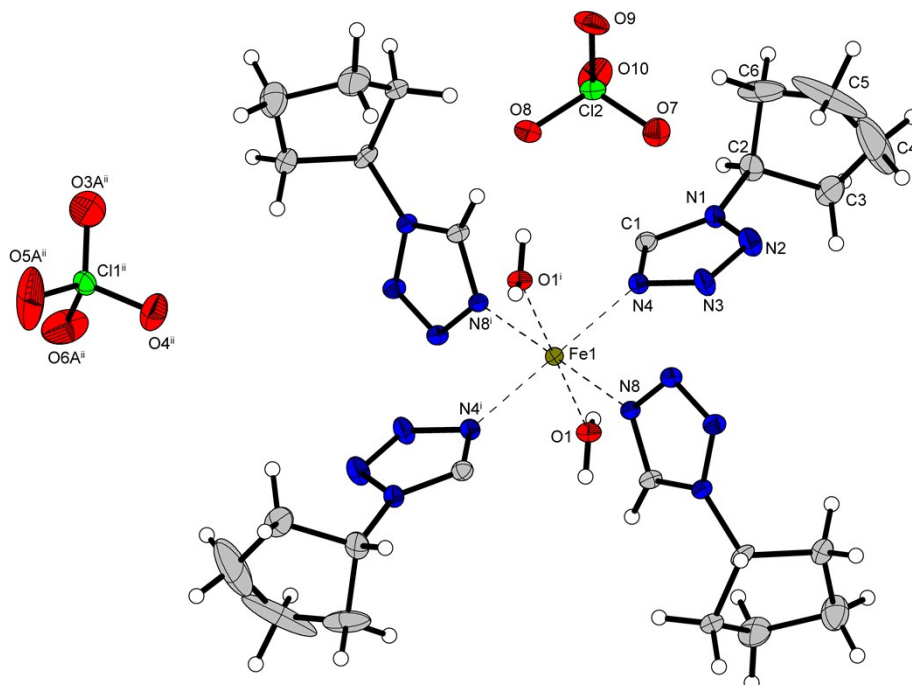

**Fig. S13** Molecular unit of **21**. Selected bond lengths (Å): Fe1–O1 2.084(2), Fe1–N4 2.179(2), Fe1–N8 2.229(2); select bond angles (°): O1–Fe1–N4 87.35(9), O1–Fe1–N8 87.44(9), O1–Fe1–O1<sup>i</sup> 180.00, O1–Fe1–N4<sup>i</sup> 92.65(9), N4–Fe1–N8 93.30(9). Symmetry codes: (i)  $1-x, 1-y, 1-z$ , (ii)  $1-x, 2-y, 1-z$ .



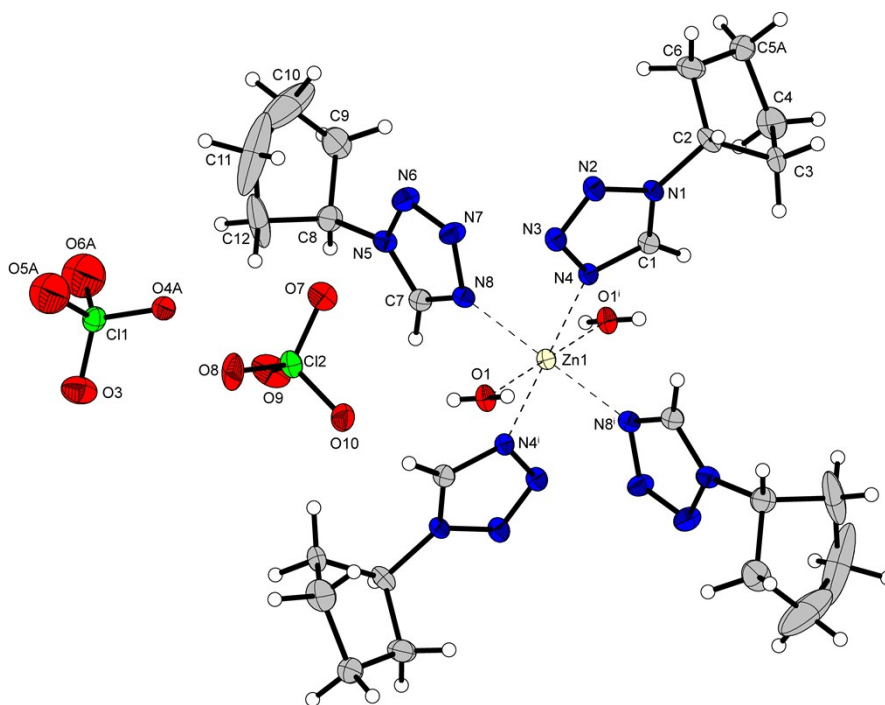

**Fig. S14** Molecular unit of **22**. Selected bond lengths (Å): Zn1–O1 2.103(4), Zn1–N4 2.203(4), Zn1–N8 2.129(4); select bond angles (°): O1–Zn1–N4 92.85(14), O1–Zn1–N8 92.51(15), O1–Zn1–O1<sup>i</sup> 180.00, O1–Zn1–N4<sup>i</sup> 87.15(14). Symmetry codes: (i) 1–x, 2–y, 1–z, (ii) 1–x, 1–y, 1–z.

#### 4. DTA plots

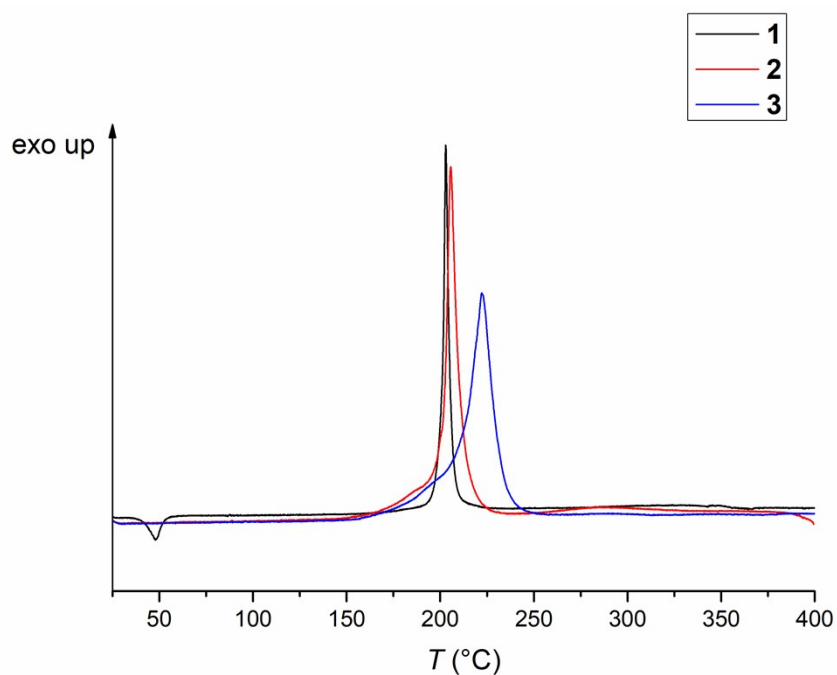

**Fig. S15** DTA plots of ligands **1–3**.

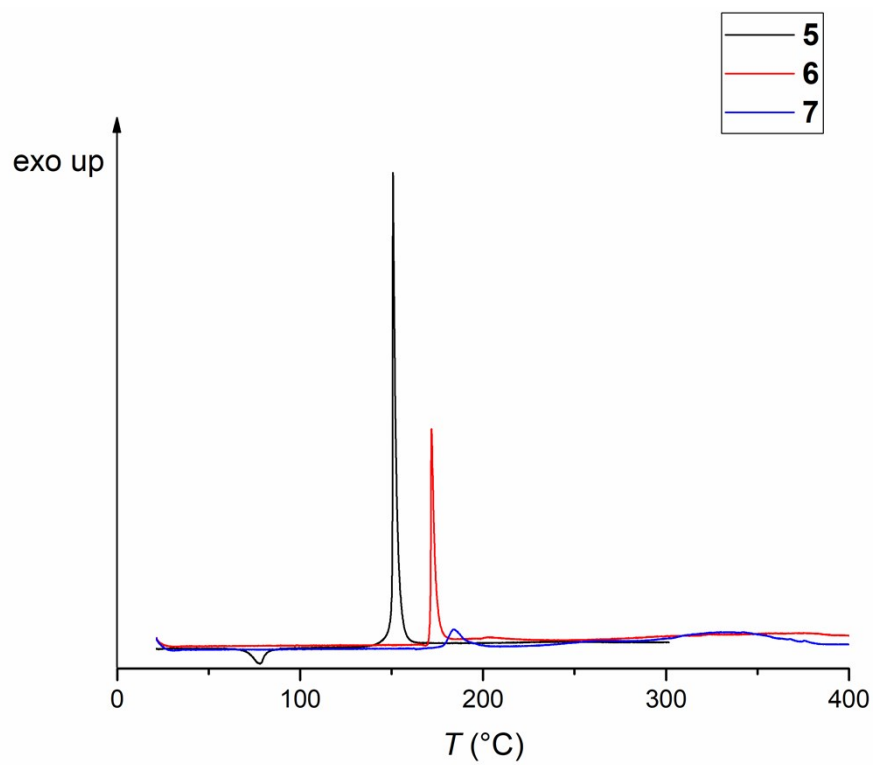

**Fig. S16** DTA plots of nitrate complexes **5–7**.

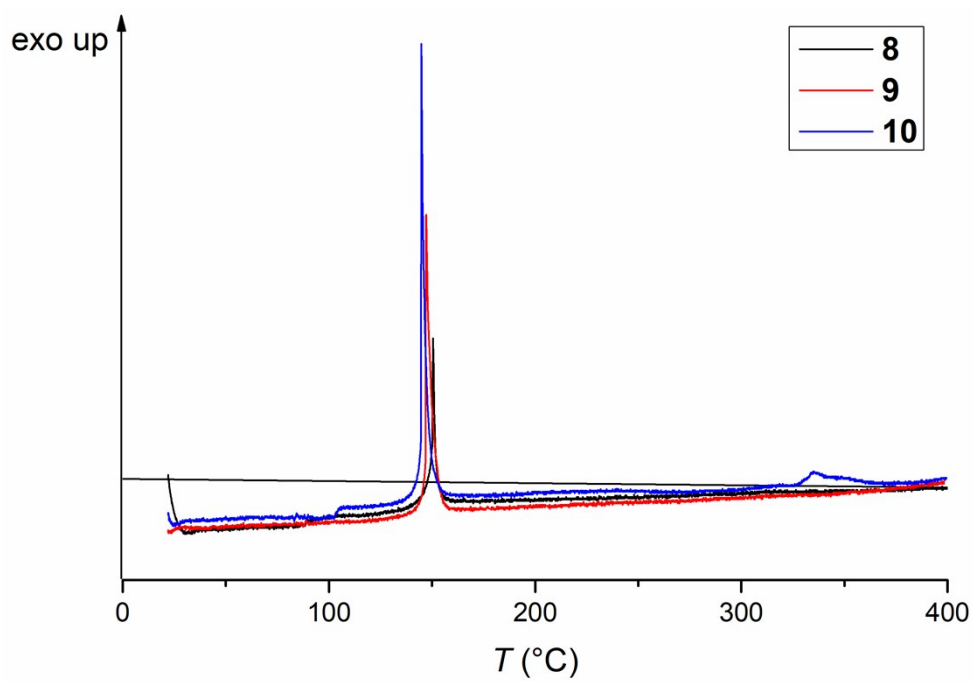

**Fig. S17** DTA plots of azide complexes **8–10**.

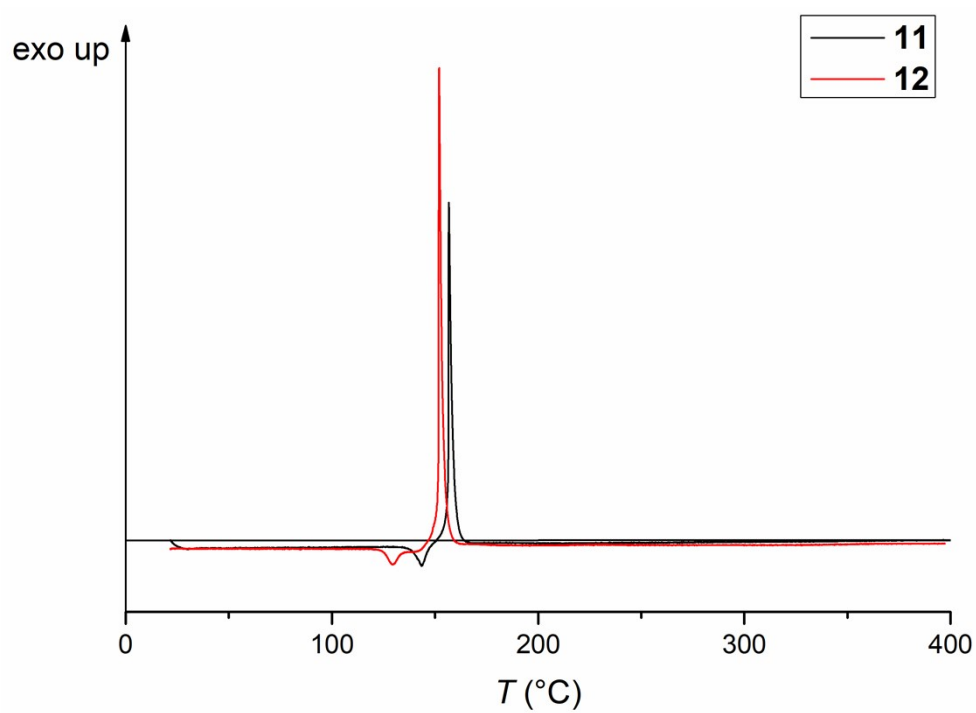

**Fig. S18** DTA plots of chlorate complexes **11** and **12**.

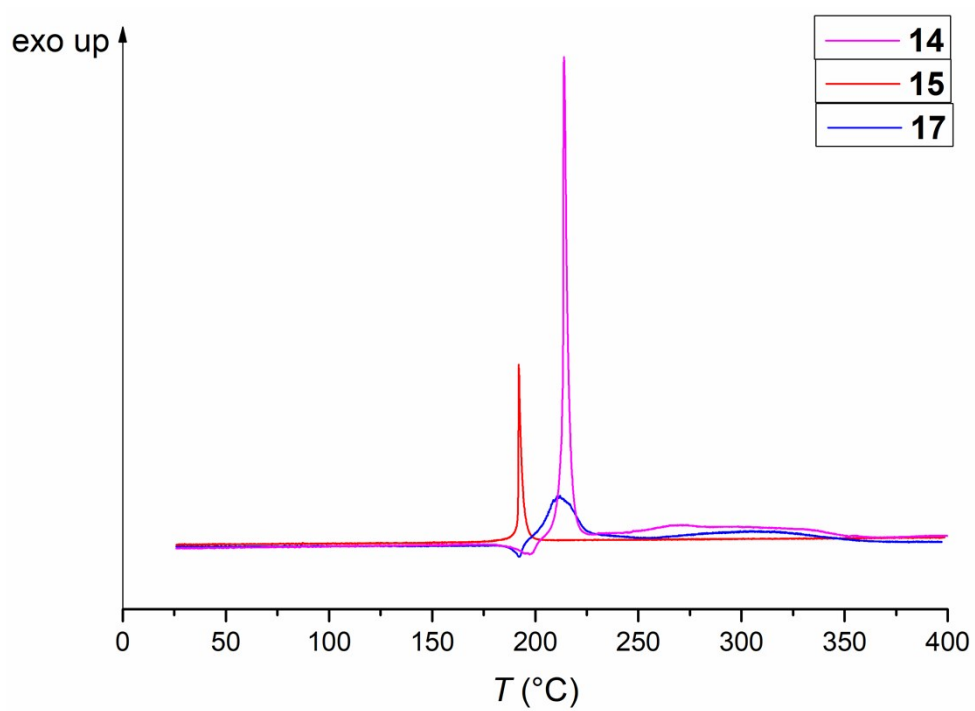

**Fig. S19** DTA plots of perchlorate complexes **14**, **15**, and **17**.

## 5. TGA plots

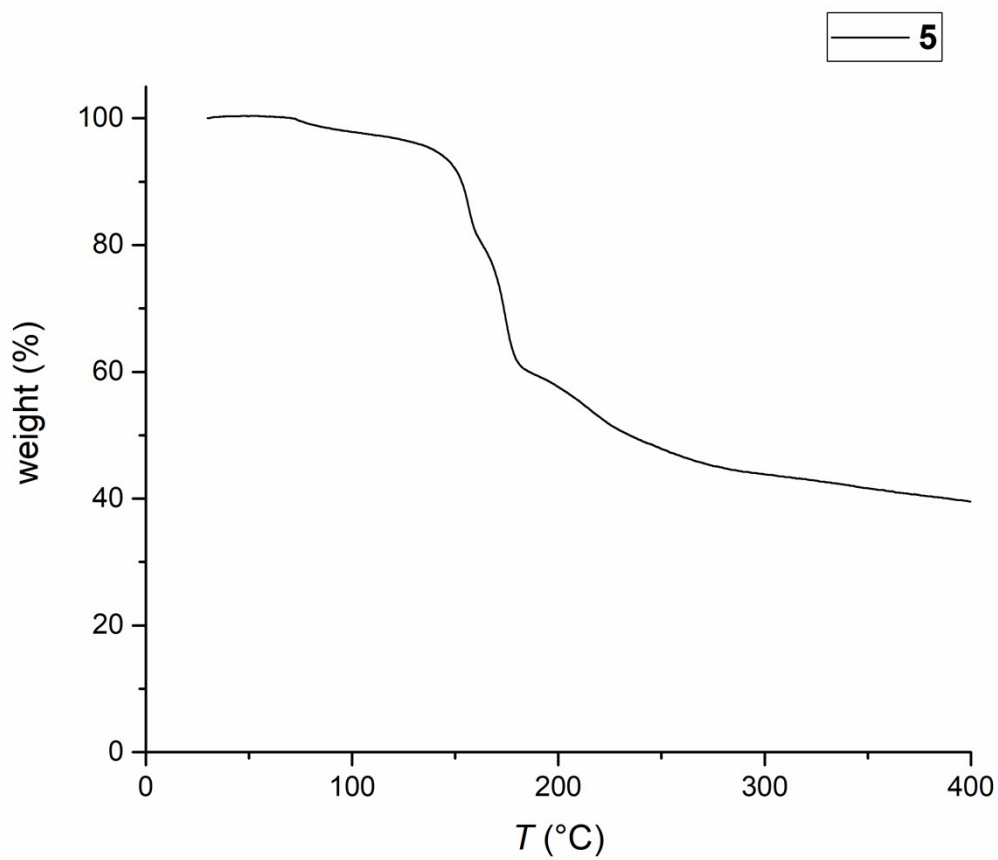

**Fig. S20** TGA plot of **5**.

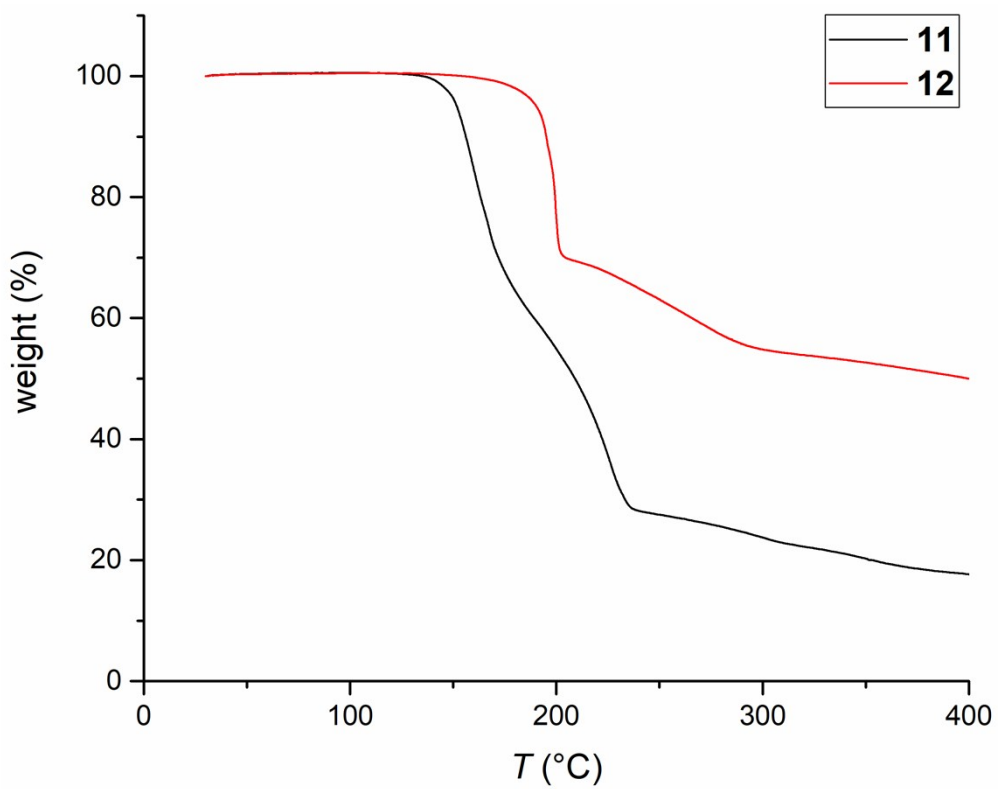

**Fig. S21** TGA plots of **11** and **12**.

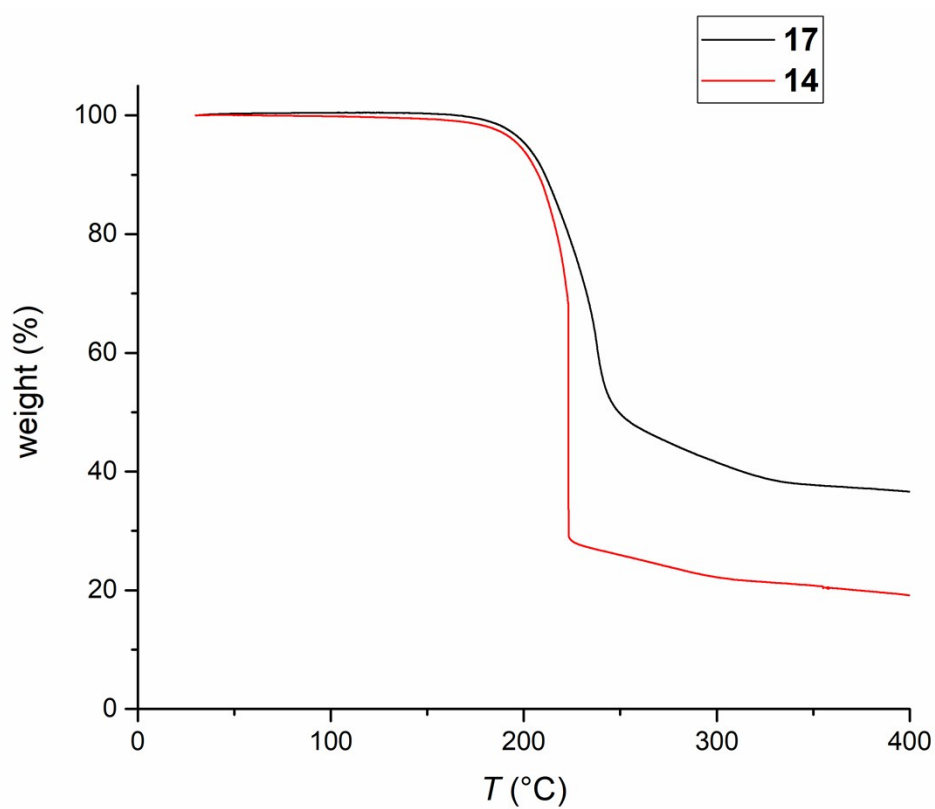

**Fig. S22** DTA plots of **14** and **17**.

## 6. Hot Plate and Hot Needle Tests

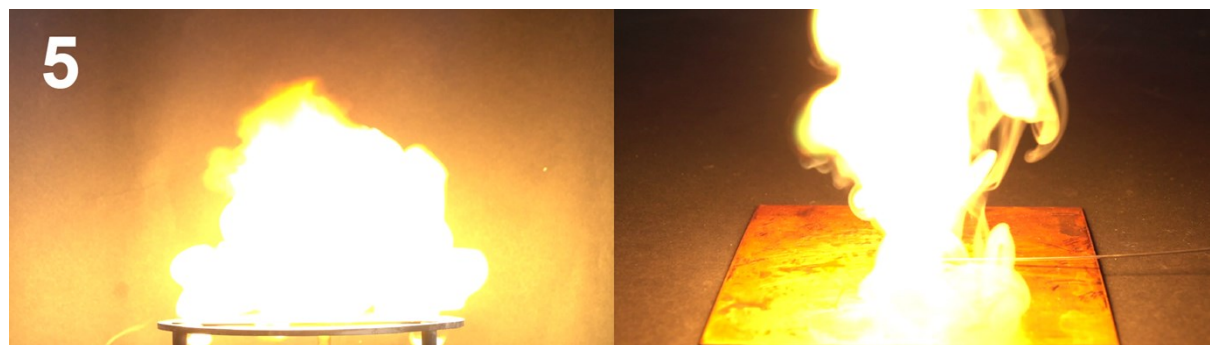

**Fig. S23** Hot plate (left) and hot needle (right) tests of nitrate complex **5**.

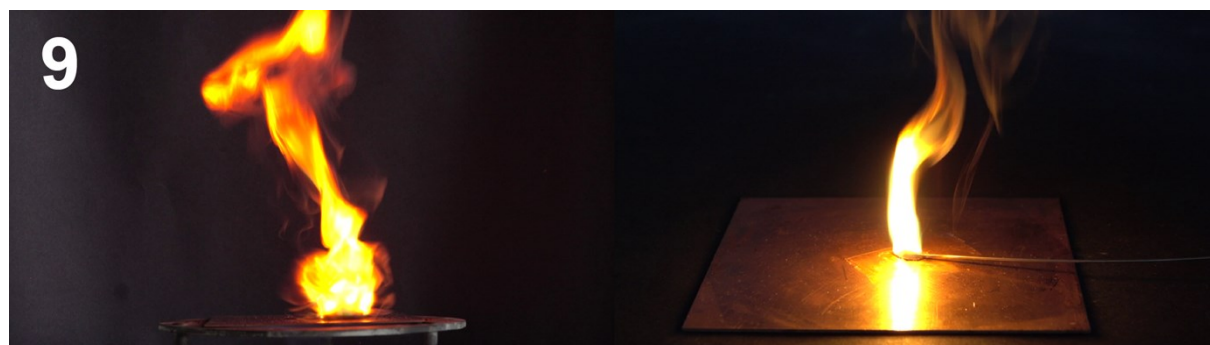

**Fig. S24** Hot plate (left) and hot needle (right) tests of azide complex **9**.

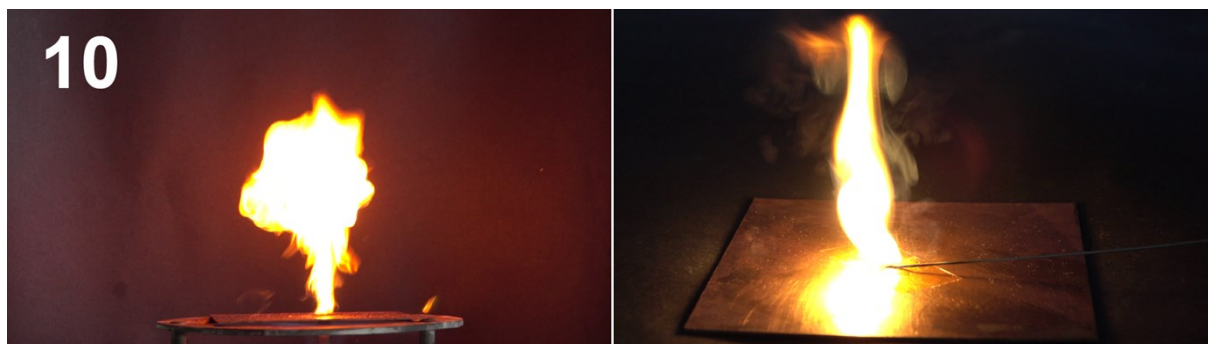

**Fig. S25** Hot plate (left) and hot needle (right) tests of azide complex **10**.

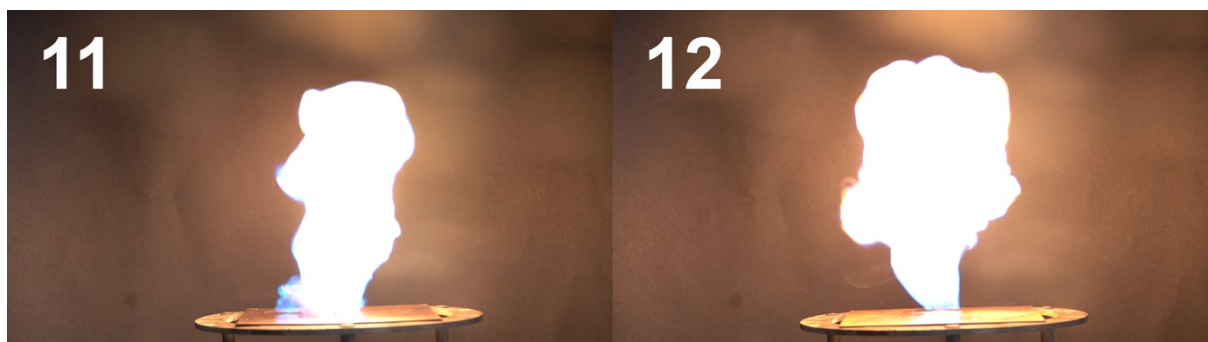

**Fig. S26** Deflagrations of ECC **11** and **12** during HP tests.

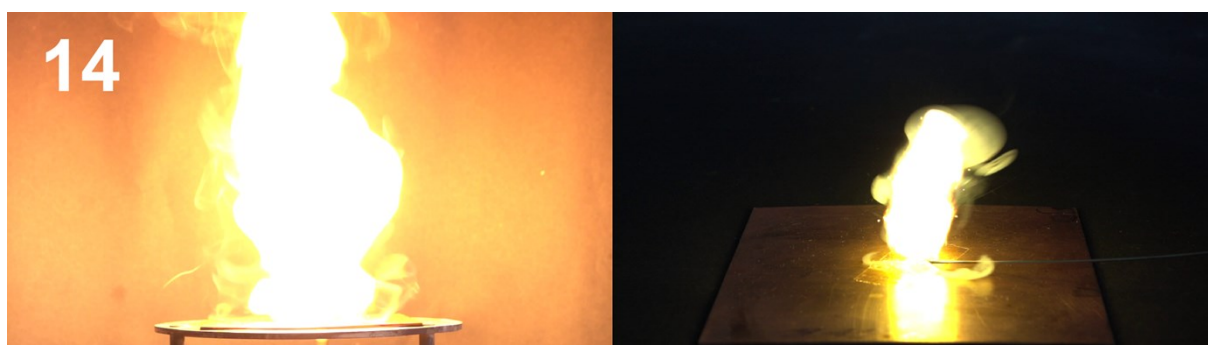

**Fig. S27** Hot plate (left) and hot needle (right) tests of manganese complex **14**.

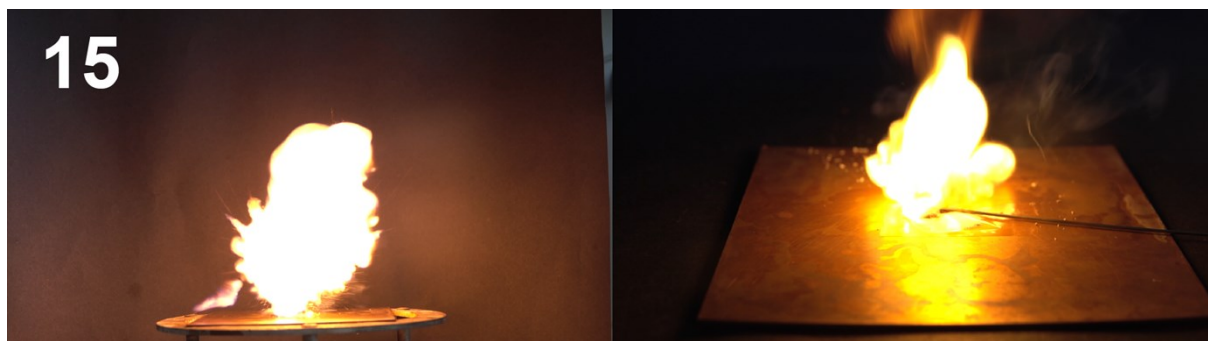

**Fig. S28** Hot plate (left) and hot needle (right) tests of iron complex **15**.



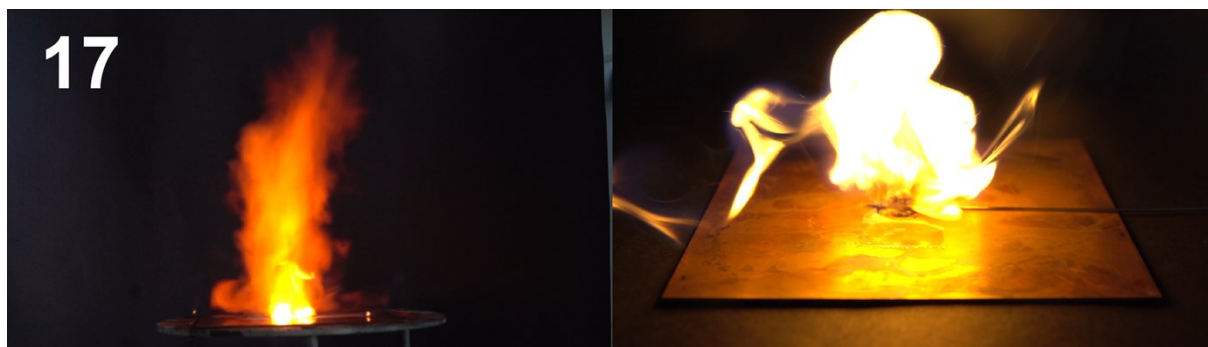

**Fig. S29** Hot plate (left) and hot needle (right) tests of zinc complex **17**.

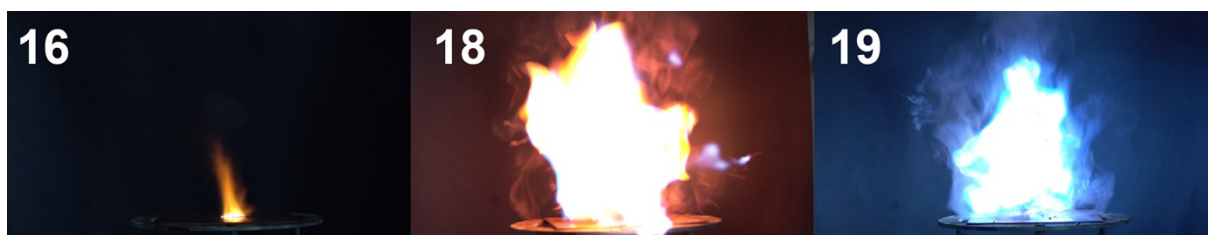

**Fig. S30** Results of the hot plate tests of copper perchlorate compounds **16**, **18**, and **19**.

## 7. Magnetic Properties

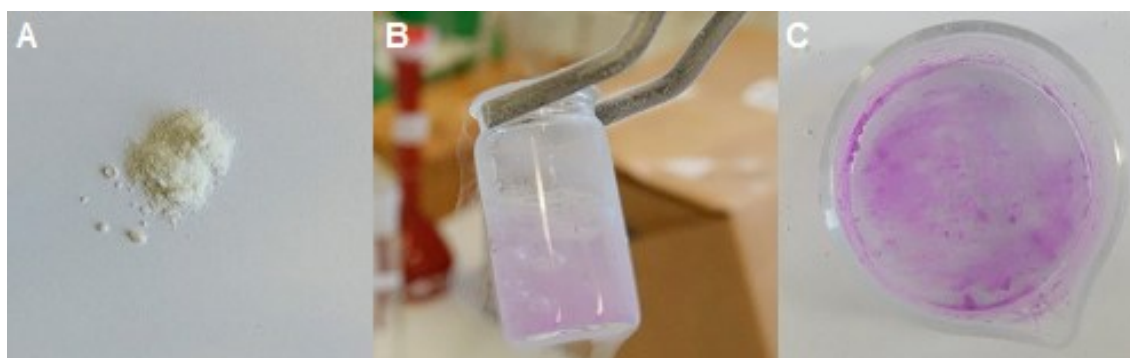

**Fig. S31**  $[\text{Fe}(\text{C}_3\text{tz})_6](\text{ClO}_4)_2$  (**15**) at room temperature (A) and cooled with liquid nitrogen (B, C) revealing a thermochromic effect.

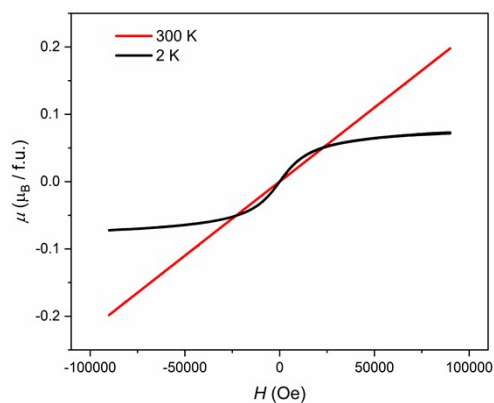

**Fig. S32** Magnetization isotherms of  $[\text{Fe}(\text{C}_3\text{tz})_6](\text{ClO}_4)_2$  at 300 K (red) and 2 K (black) per formula unit.

## 8. Experimental part and general methods

All chemicals and solvents were employed as received (Sigma-Aldrich, Fluka, Acros, ABCR).  $^1\text{H}$ ,  $^{13}\text{C}$ , and  $^{15}\text{N}$  spectra were recorded at ambient temperature using a JEOL Bruker 400, Eclipse 270, JEOL EX 400 or a JEOL Eclipse 400 instrument. The chemical shifts quoted in ppm in the text refer to typical standards such as tetramethylsilane ( $^1\text{H}$ ,  $^{13}\text{C}$ ) and nitromethane ( $^{15}\text{N}$ ) in  $d_6$ -DMSO,  $d$ - $\text{CHCl}_3$  or  $d_3$ -MeCN as the solvents. The  $^1\text{H}$ - $^{15}\text{N}$ -HMBC NMR spectra were measured with a data matrix of  $1024 \times 256$ , an applied zero filling of  $2048 \times 4096$ , 32 scans per round, a relaxation delay of 1 second, an acquisition time of 0.3 second at a concentration of 140 mg/mL and an overall measurement time of approx. 3 h. Endothermic and exothermic events of the described compounds, which indicate melting, evaporation or decomposition, are given as the extrapolated onset temperatures. The samples were measured in a range of 25–400 °C at a heating rate of 5 °C  $\text{min}^{-1}$  through differential thermal analysis (DTA) with an OZM Research DTA 552-Ex instrument and partly by thermal gravimetric analysis (TGA) with a PerkinElmer TGA4000. Infrared spectra were measured with pure samples on a Perkin-Elmer BXII FT-IR system with a Smith DuraSampler IR II diamond ATR. Determination of the carbon, hydrogen and nitrogen contents was carried out by combustion analysis using an Elementar Vario El (nitrogen values determined are often lower than those calculated due to their explosive behaviour). Impact sensitivity tests were carried out according to STANAG 4489<sup>S9</sup> with a modified instruction<sup>S10</sup> using a BAM (Bundesanstalt für Materialforschung) drop hammer.<sup>S11,12</sup> Friction sensitivity tests were carried out according to STANAG 4487<sup>S13</sup> with a modified instruction<sup>S14</sup> using the BAM friction tester. The classification of the tested compounds results from the “UN Recommendations on the Transport of Dangerous Goods”.<sup>S15</sup> Additionally, all compounds were tested to determine the sensitivity toward electrical discharge using the OZM Electric Spark Tester ESD 2010 EN or OZM Electric Spark XSpark10 device.<sup>S10</sup> Hot plate and hot needle tests were performed in order to classify the initiation capability of selected complexes. The samples were fixed on a copper plate underneath adhesive tape and initiated by a red-hot needle. Strong deflagration or detonation of the compound usually indicates a valuable primary explosive. The safe and straightforward hot plate test only shows the behaviour of the unconfined sample toward fast heating on a copper plate. It does not necessarily allow any conclusions on a compound’s capability as a suitable primary explosive. Magnetization measurements were performed with a Quantum Design Inc. physical property measurement system (PPMS) equipped with a vibrating sample magnetometer. Data were collected between temperatures of 2-300 K at field



strengths of  $\pm 90$  kOe with the PPMS MultiVu software package.<sup>S16</sup> A diamagnetic correction accounting for the organic part of the sample.<sup>S17</sup>

**CAUTION!** *All investigated compounds are potentially explosive energetic materials, which show partly increased sensitivities toward various stimuli (e.g. elevated temperatures, impact, friction or electrostatic discharge). Therefore, proper security precautions (safety glasses, face shield, earthed equipment and shoes, leather jacket, Kevlar gloves, Kevlar sleeves and ear plugs) have to be worn while synthesizing and handling the described compounds.*

### Procedures for the preparation of the tetrazole ligands

#### 1-cyclopropyl-5H-tetrazole (C<sub>3</sub>tz, **1**)

According to a modified literature procedure,<sup>S18</sup> glacial acetic acid (40.0 mL, 0.70 mol, 7.0 equiv.) was added dropwise to a suspension of cyclopropylamine (6.92 mL, 0.10 mol, 1.0 equiv.), sodium azide (7.20 g, 0.11 mol, 1.1 equiv.) and triethyl orthoformate (44 mL, 0.3 mol, 3.0 equiv.) at 50 °C under continuous stirring. The resulting slightly yellow suspension was stirred at 90 °C for 4.5 h. After the mixture was cooled to room temperature concentrated hydrochloric acid (7.29 mL) and water (50 mL) were added. The product was extracted with EtOAc (3 x 70 mL). The combined organic layers were treated with water (100 mL), NaHCO<sub>3</sub> solution (50 mL) and brine (50 mL) and dried over Na<sub>2</sub>SO<sub>4</sub>. The solvent was evaporated under reduced pressure and the obtained crude 1-cyclopropyl-5H-tetrazole (C<sub>3</sub>tz, **1**) was recrystallized from methanol (5 mL) at room temperature yielding ligand **1** as colourless needles (5.44 g, 49.4 mmol, 49%).

**DTA** onset (5 °C min<sup>-1</sup>): 42 °C (endothermic), 200 °C (exothermic.); **IR** (ATR, cm<sup>-1</sup>):  $\tilde{\nu}$  = 3126 (s), 3069 (vw), 3032 (vw), 2955 (w), 1784 (w), 1718 (w), 1501 (w), 1484 (s), 1463 (m), 1418 (s), 1394 (w), 1355 (m), 1271 (w), 1242 (w), 1209 (s), 1182 (vs), 1097 (vs), 1077 (s), 1063 (s), 1041 (s), 1018 (m), 961 (vs), 949 (m), 894 (s), 875 (s), 838 (s), 783 (w), 722 (m), 677 (vs), 622 (vs), 466 (w); **<sup>1</sup>H NMR** (CDCl<sub>3</sub>, 25 °C, ppm)  $\delta$ : 8.63 (s, 1H), 3.78 (m, 1H), 1.28 (m, 4H); **<sup>13</sup>C NMR** (CDCl<sub>3</sub>, 25 °C, ppm)  $\delta$ : 143.27, 29.44, 7.10. **<sup>1</sup>H-<sup>15</sup>N-HMBC NMR** (MeCN-*d*<sub>3</sub>, 25 °C, ppm)  $\delta$ : -7.7 (N3), -56.6 (N2), -71.5 (N4), -157.5 (N1); **EA** (C<sub>4</sub>H<sub>6</sub>N<sub>4</sub>, 110.12) calcd.: C 43.63, H 5.49, N 50.88%, found: C 43.53, H 5.09, N 50.85%; **BAM drop hammer**: >40 J, **friction tester**: >360 N; **ESD**: 750 mJ (at grain size >1000  $\mu$ m).

#### 1-cyclobutyl-5H-tetrazole (C<sub>4</sub>tz, **2**)

According to a modified literature procedure,<sup>S18</sup> glacial acetic acid (143 mL, 2.5 mol, 50.0 equiv.) was added dropwise to a suspension of cyclobutylamine hydrochloride (5.38 mL, 0.05 mol, 1.0 equiv.), sodium azide (4.88 g, 0.075 mol, 1.5 equiv.), and triethyl orthoformate (12.5 mL, 0.075 mol, 1.5 equiv.) at 50 °C under continuous stirring. The resulting slightly yellow suspension was stirred at 90 °C for 48 h. After the mixture was cooled to room temperature hydrochloric acid (250 mL, 2M) was added to the suspension. Purification was carried out analogously to **1**. After solvent evaporation under reduced pressure the pure 1-cyclobutyl-5*H*-tetrazole was obtained as yellow oil (3.56 g, 28.7 mmol, 57%).

**DTA** onset (5 °C min<sup>-1</sup>): 202 °C (exothermic); **IR** (ATR, cm<sup>-1</sup>):  $\tilde{\nu}$  = 3194(m), 2960(s), 2847(s), 2192(w), 2162(s), 2154(s), 2027(w), 2010(vw), 1872(w), 1698(w), 1664(w), 1657(w), 1609(w), 1539(m), 1471(m), 1428(s), 1418(s), 1350(w), 1333(m), 1283(vs), 1257(s), 1228(vs), 1228(vs), 1189(vs), 1115(s), 1004(w), 988(w), 968(w), 875(vw), 826(m); **<sup>1</sup>H NMR** (CDCl<sub>3</sub>, 25 °C, ppm)  $\delta$ : 8.63 (s, 1H), 5.08 (m, 1H), 2.62 (m, 4H), 2.02 (m, 2H), **<sup>13</sup>C NMR** (CDCl<sub>3</sub>, 25 °C, ppm)  $\delta$ : 141.38, 52.50, 30.54, 15.29; **<sup>1</sup>H-<sup>15</sup>N-HMBC NMR** (MeCN-*d*<sub>3</sub>, 25 °C, ppm)  $\delta$ : -8.0 (N3), -34.6 (N2), -71.6 (N4), -150.0 (N1); **EA** (C<sub>5</sub>H<sub>8</sub>N<sub>4</sub>, 124.15) calcd.: C 48.37, H 6.50, N 45.13%, found: C 48.12, H 6.27, N 44.65%; **BAM drop hammer**: >40 J, **friction tester**: >360 N.

### 1-cyclopentyl-5*H*-tetrazole (C<sub>5</sub>tz, **3**)

According to a modified literature procedure,<sup>S18</sup> glacial acetic acid (199 mL, 3.50 mol, 50.0 equiv.) was added dropwise to a suspension of cyclopentylamine (7.17 mL, 0.07 mol, 1.0 equiv.), sodium azide (6.77 g, 0.10 mol, 1.5 equiv.), and triethyl orthoformate (17.3 mL, 0.10 mol, 1.5 equiv.) at 50 °C under continuous stirring. The resulting slightly yellow suspension was stirred at 90 °C for 48 h. After the mixture was cooled to room temperature hydrochloric acid (350 mL, 2M) was added to the suspension. Purification was carried out analogously to **1** and **2**. After solvent evaporation under reduced pressure the pure 1-cyclopentyl-5*H*-tetrazole was obtained as orange oil (7.69 g, 55.7 mmol, 80%).

**DTA** onset (5 °C min<sup>-1</sup>): 202 °C (exothermic.); **IR** (ATR, cm<sup>-1</sup>):  $\tilde{\nu}$  = 3141(m), 2959(s), 2875(m), 2160(m), 2151(m), 2037(w), 1873(vw), 1709(w), 1664(w), 1610(w), 1541(m), 1472(m), 1426(s), 1412(s), 1332(m), 1296(s), 1283(s), 1255(s), 1227(vs), 1194(vs), 1105(s), 1025(w), 1025(w), 970(w), 949(w), 876(vw), 826(w), 809(m), 736(m), 708(m); **<sup>1</sup>H NMR** (DMSO-*d*<sub>6</sub>, 25 °C, ppm)  $\delta$ : 9.45 (s, 1H), 5.06 (m, 1H), 1.96 (m, 4H), 1.74 (m, 4H); **<sup>13</sup>C NMR** (DMSO-*d*<sub>6</sub>, 25 °C, ppm)  $\delta$ : 142.89, 59.65, 32.55, 32.43; **<sup>1</sup>H-<sup>15</sup>N-HMBC NMR** (MeCN-*d*<sub>3</sub>,

25 °C, ppm)  $\delta$ : -7.9 (N3), -34.0 (N2), -71.5 (N4), -149.8 (N1); **EA** (C<sub>6</sub>H<sub>10</sub>N<sub>4</sub>, 138.17) calcd.: C 52.16, H 7.30, N 40.55%, found: C 52.09, H 6.72, N 37.95%; **BAM drop hammer**: >40 J, **friction tester**: >360 N.

### [Cu<sub>2</sub>(C<sub>3</sub>tz)<sub>8</sub>(H<sub>2</sub>O)<sub>2</sub>](NO<sub>3</sub>)<sub>4</sub> (**5**)

For the preparation of the nitrate coordination compounds, copper(II) nitrate trihydrate (109 mg, 0.45 mmol, 1.0 equiv.) and C<sub>3</sub>tz (297 mg, 2.70 mmol, 6.0 equiv.) were dissolved in ethanol (2 mL) separately and combined at room temperature. The mixture was stirred for 5 min at 80 °C before it was allowed to crystallize at room temperature. A mixture of [Cu<sub>2</sub>(C<sub>3</sub>tz)<sub>4</sub>(NO<sub>3</sub>)<sub>4</sub>] and [Cu<sub>2</sub>(C<sub>3</sub>tz)<sub>8</sub>(H<sub>2</sub>O)<sub>2</sub>](NO<sub>3</sub>)<sub>4</sub> was obtained. After recrystallization in water (3 mL), pure compound [Cu<sub>2</sub>(C<sub>3</sub>tz)<sub>8</sub>(H<sub>2</sub>O)<sub>2</sub>](NO<sub>3</sub>)<sub>4</sub> was obtained.

Compound **5** was received as medium blue crystals. Yield: 258 mg (0.40 mmol, 89%).

**DTA** onset (5 °C min<sup>-1</sup>): 71 °C (endothermic), 150 °C (exothermic.); **IR** (ATR, cm<sup>-1</sup>):  $\tilde{\nu}$  = 3411(w), 3085(m), 2989(w), 1748(vw), 1628(w), 1574(vw), 1513(m), 1459(w), 1421(m), 1381(s), 1337(vs), 1329(vs), 1221(s), 1207(m), 1194(m), 1178(w), 1154(w), 1100(s), 1086(s), 1036(m), 1011(m), 951(w), 920(w), 920(w), 880(w), 829(m), 797(vw), 715(vw), 672(m), 631(m), 526(w), 476 (w), 404 (w); **EA** (C<sub>16</sub>H<sub>26</sub>CuN<sub>18</sub>O<sub>7</sub>, 646.05): calcd.: C 29.75, H 4.06, N 39.03%, found: C 29.65, H 4.06, N 39.12%; **BAM drop hammer**: >40 J, **friction tester**: >360 N; **ESD**: 1 J (at grain size >1000  $\mu$ m).

### [Cu(C<sub>4</sub>tz)<sub>3</sub>(NO<sub>3</sub>)<sub>2</sub>] (**6**)

Copper(II) nitrate trihydrate (109 mg, 0.45 mmol, 1.0 equiv.) and C<sub>4</sub>tz (335 mg, 2.70 mmol, 6.0 equiv.) were dissolved in ethanol separately and combined at room temperature. The mixture was stirred for 5 min at 80 °C before it could crystallize at room temperature to obtain the crude product. Recrystallization in ethanol (3 mL) yielded pure complex **6** compound as steel blue crystals. Yield: 173 mg (0.31 mmol, 69%).

**DTA** onset (5 °C min<sup>-1</sup>): 160 °C (exothermic.); **IR** (ATR, cm<sup>-1</sup>):  $\tilde{\nu}$  = 3134(w), 3126(w), 3000(w), 2957(w), 1572(vw), 1481(m), 1459(s), 1431(s), 1361(w), 1342(w), 1297(s), 1287(vs), 1252(m), 1233(w), 1186(m), 1165(m), 1113(s), 1091(m), 1048(w), 1021(s), 1012(s), 994(m), 950(w), 950(w), 893(m), 837(w), 812(m), 743(w), 728(w), 720(m), 672(s), 599(vw); **EA** (C<sub>15</sub>H<sub>24</sub>CuN<sub>14</sub>O<sub>6</sub>, 560.00) calcd.: C 32.17, H 4.32, N 35.02%, found: C 32.21, H 4.16, N 35.10%; **BAM drop hammer**: 9 J, **friction tester**: >360 N; **ESD**: 90 mJ (at grain size 500–1000  $\mu$ m).

### [Cu(C<sub>5</sub>tz)<sub>2</sub>(NO<sub>3</sub>)<sub>2</sub>] (7)

Copper(II) nitrate trihydrate (109 mg, 0.45 mmol, 1.0 equiv.) and C<sub>5</sub>tz (373 mg, 2.70 mmol, 6.0 equiv.) were dissolved in acetonitrile separately and combined at room temperature. The mixture was stirred for 5 min at 80 °C before it was allowed to crystallize at room temperature to obtain the crude product. Recrystallization in ethanol (3 mL) yielded pure complex compound. ECC 7 was crystallized as steel blue crystals. Yield: 49 mg (0.11 mmol, 23%).

**DTA** onset (5 °C min<sup>-1</sup>): 165 °C (exothermic.); **IR** (ATR, cm<sup>-1</sup>):  $\tilde{\nu}$  = 3143(m), 2957(m), 2876(w), 1765(vw), 1722(vw), 1572(vw), 1500(s), 1477(vs), 1454(s), 1372(m), 1260(vs), 1186(s), 1155(s), 1097(s), 1038(m), 1012(vs), 960(m), 947(m), 887(m), 810(s), 749(m), 708(w), 668(m), 668(m), 519(vw); **EA** (C<sub>12</sub>H<sub>20</sub>CuN<sub>10</sub>O<sub>6</sub>, 463.90) calcd.: C 31.07, H 4.35, N 30.19%, found: C 30.99, H 4.35, N 30.18%; **BAM drop hammer**: <40 J, **friction tester**: >360 N; **ESD**: 750 mJ (at grain size >1000 μm).

### General procedure for the preparation of copper(II) azide complexes 8–10

Copper(II) nitrate trihydrate (60.4 mg, 0.25 mmol, 1.0 equiv.), and the respective amounts of ligand (**1**: 55.0 mg, 0.50 mmol, 2.0 equiv.; **2**: 31.0 mg, 0.25 mmol, 1.0 equiv.; **3**: 69.0 mg, 0.50 mmol, 2.0 equiv.) were dissolved in water (4 mL), except ligand **3** which was dissolved in 4 mL water/ethanol 1/1. Sodium azide (32.5 mg, 0.50 mmol, 2.0 equiv.) dissolved in 2 mL water was added dropwise at room temperature while stirring and the complexes started precipitating as brown precipitates. The compounds were filtered off and washed with water.

### [Cu(C<sub>3</sub>tz)(N<sub>3</sub>)<sub>2</sub>] (8)

Complex **8** was obtained in the form of a brown solid. Yield: 45.2 mg (0.18 mmol, 70%).

**DTA** onset (5 °C min<sup>-1</sup>): 149 °C (exo.); **IR** (ATR, cm<sup>-1</sup>):  $\tilde{\nu}$  = 3114 (w), 2095 (vs), 2053 (vs), 1814 (vw), 1505 (w), 1454 (w), 1429 (vw), 1417 (w), 1369 (w), 1349 (w), 1297 (m), 1215 (w), 1185 (m), 1165 (vw), 1095 (m), 1079 (w), 1060 (w), 1038 (m), 1010 (m), 951 (vw), 911 (w), 879 (w), 834 (m), 692 (w), 669 (m), 655 (w), 622 (w), 594 (w), 586 (w), 472 (vw), 412 (w); **EA** (C<sub>4</sub>H<sub>6</sub>CuN<sub>10</sub>, 257.71) calcd.: C 18.64, H 2.35, N 54.35%, found: C 18.65, H 2.45, N 54.29%; **BAM drop hammer**: <1 J, **friction tester**: 5 N; **ESD**: 37 mJ (at grain size <100 μm).

### [Cu(C<sub>4</sub>tz)(N<sub>3</sub>)<sub>2</sub>] (9)

ECC **9** was received as brown solid. Yield: 51.5 mg (0.19 mmol, 76%).

**DTA** onset (5 °C min<sup>-1</sup>): 148 °C (exothermic); **IR** (ATR, cm<sup>-1</sup>):  $\tilde{\nu}$  = 3365 (vw), 3323 (vw), 3128 (w), 2998 (vw), 2961 (vw), 2095 (s), 2048 (vs), 1572 (vw), 1501 (m), 1478 (w), 1458 (vw), 1436 (vw), 1368 (w), 1342 (w), 1288 (m), 1247 (w), 1230 (w), 1199 (w), 1177 (m), 1120 (m), 1088 (m), 1036 (w), 1022 (m), 947 (vw), 724 (w), 693 (w), 670 (m), 659 (w), 603 (w), 586 (w), 556 (vw), 430 (w), 414 (w); **EA** (C<sub>5</sub>H<sub>8</sub>CuN<sub>10</sub>, 271.74) calcd.: C 22.10, H 2.97, N 51.55%, found: C 21.86, H 2.79, N 51.35%; **BAM drop hammer**: 8 J, **friction tester**: 60 N; **ESD**: 50 mJ (at grain size <100 μm).

### [Cu(C<sub>5</sub>tz)(N<sub>3</sub>)<sub>2</sub>] (10)

Azide complex **10** precipitated as brown solid. Yield: 49.5 mg (0.17 mmol, 68%).

**DTA** onset (5 °C min<sup>-1</sup>): 145 °C (exothermic); **IR** (ATR, cm<sup>-1</sup>):  $\tilde{\nu}$  = 3363(vw), 3315(vw), 3131(w), 2964(w), 2876(w), 2085(s), 2073(s), 2039(vs), 1503(m), 1476(w), 1449(w), 1375(w), 1343(w), 1315(w), 1293(m), 1277(m), 1180(m), 1153(w), 1094(m), 1037(w), 1018(m), 951(w), 951(w), 906(w), 886(w), 821(vw), 771(w), 689(w), 673(m), 660(w); **EA** (C<sub>6</sub>H<sub>10</sub>CuN<sub>10</sub>, 257.71) calcd.: C 25.22, H 3.53, N 49.02%, found: C 25.34, H 3.67, N 48.49%; **BAM drop hammer**: 5 J, **friction tester**: 216 N; **ESD**: 76 mJ (at grain size <100 μm).

### General procedure for preparation of copper(II) chlorate complexes

Barium chlorate monohydrate (145 mg, 0.45 mmol, 1.0 equiv.) and copper(II) sulphate pentahydrate (112 mg, 0.45 mmol, 1.0 equiv.) were dissolved in water (5 mL), combined and stirred for 5 min. The mixture was cooled to 0 °C and the precipitated barium sulphate, filtered off. The solvent was evaporated under reduced pressure and pure copper(II) chlorate was dissolved in ethanol (2 mL). The respective amounts of ligand (**1**: 297 mg, 2.70 mmol, 6.0 equiv.; **2**: 335 mg, 2.70 mmol, 6.0 equiv.; **3**: 373 mg, 2.70 mmol, 6.0 equiv.) were each dissolved in ethanol (2 mL), and added dropwise to the dissolved copper salt while stirring at room temperature. The reaction mixture was stirred for 5 min at 80 °C before it was allowed to crystallize at room temperature. Crystallization process took up 1–2 days. The compounds were filtered off before complete evaporation of the solvent and were washed with cold ethanol.

### [Cu(C<sub>3</sub>tz)<sub>6</sub>](ClO<sub>3</sub>)<sub>2</sub> (11)

Complex **11** crystallized as sky blue hexagonal plates overnight. Yield: 215 mg (0.24 mmol, 53%).

**DTA** onset ( $5\text{ }^{\circ}\text{C min}^{-1}$ ):  $138\text{ }^{\circ}\text{C}$  (endothermic),  $156\text{ }^{\circ}\text{C}$  (exothermic); **IR** (ATR,  $\text{cm}^{-1}$ ):  $\tilde{\nu} = 3102$  (m),  $3063$  (w),  $3017$  (vw),  $2986$  (w),  $1572$  (vw),  $1505$  (m),  $1460$  (vw),  $1429$  (w),  $1420$  (m),  $1363$  (w),  $1304$  (vw),  $1224$  (m),  $1199$  (m),  $1187$  (m),  $1171$  (vw),  $1115$  (w),  $1102$  (s),  $1079$  (w),  $1060$  (w),  $1038$  (m),  $1029$  (w),  $1007$  (m),  $968$  (vs),  $936$  (s),  $876$  (m),  $840$  (m),  $777$  (w),  $720$  (w),  $672$  (s),  $621$  (s),  $608$  (m),  $473$  (m); **EA** ( $\text{C}_{24}\text{H}_{36}\text{Cl}_2\text{CuN}_{24}\text{O}_6$ ,  $907.20$ ) calcd.: C 32.35, H 4.07, N 37.72%, found: C 32.34, H 3.77, N 37.84%; **BAM drop hammer**: 2 J, **friction tester**: 32 N; **ESD**: 100 mJ (at grain size 500–1000  $\mu\text{m}$ ).

Alternatively, it was also possible to precipitate  $[\text{Cu}(\text{C}_3\text{tz})_6](\text{ClO}_3)_2$  directly from the solution. After combination of the dissolved copper salt and ligand **1** at room temperature, the complex compound directly precipitated, filtered off and washed with cold ethanol. **ECC 11** was obtained in form of a light blue powder. Yield: 274 mg (0.30 mmol, 67%),

### **$[\text{Cu}(\text{C}_4\text{tz})_4(\text{ClO}_3)_2]$ (**12**)**

Compound **12** was received over night in the form of steel blue crystals. Yield: 204 mg (0.28 mmol, 62%).

**DTA** onset ( $5\text{ }^{\circ}\text{C min}^{-1}$ ):  $126\text{ }^{\circ}\text{C}$  (endothermic),  $153\text{ }^{\circ}\text{C}$  (exothermic); **IR** (ATR,  $\text{cm}^{-1}$ ):  $\tilde{\nu} = 3137$  (w),  $3123$  (w),  $2991$  (w),  $2953$  (w),  $1572$  (vw),  $1500$  (m),  $1482$  (w),  $1459$  (w),  $1446$  (w),  $1437$  (w),  $1360$  (w),  $1306$  (w),  $1247$  (w),  $1234$  (w),  $1199$  (m),  $1188$  (m),  $1168$  (w),  $1124$  (m),  $1101$  (m),  $1086$  (m),  $1022$  (m),  $987$  (s),  $952$  (s),  $902$  (vs),  $842$  (m),  $793$  (w),  $731$  (m),  $716$  (m),  $664$  (m),  $603$  (m),  $560$  (w),  $478$  (s),  $430$  (m); **EA** ( $\text{C}_{20}\text{H}_{32}\text{Cl}_2\text{CuN}_{16}\text{O}_6$ ,  $727.03$ ): calc.: C 33.04, H 4.44, N 30.83%, found: C 32.85, H 4.49, N 30.66%; **BAM drop hammer**: 5 J, **friction tester**: 36 N; **ESD**: 200 mJ (at grain size 100–500  $\mu\text{m}$ ).

### **Perchlorate complexes**

The respective amount of the transition metal salt (0.45 mmol,  $\text{Mn}(\text{ClO}_4)_2 \cdot 6\text{ H}_2\text{O}$ : 163 mg;  $\text{Fe}(\text{ClO}_4)_2 \cdot 6\text{ H}_2\text{O}$ : 163 mg, 1.0 equiv.;  $\text{Cu}(\text{ClO}_4)_2 \cdot 6\text{ H}_2\text{O}$ : 167 mg, 1.0 equiv.;  $\text{Zn}(\text{ClO}_4)_2 \cdot 6\text{ H}_2\text{O}$ : 168 mg;) and  $\text{C}_3\text{tz}$  (297 mg, 2.70 mmol, 6.0 equiv.) were each dissolved in ethanol. The ligand solution was added dropwise to the dissolved metal salt while stirring at room temperature. The reaction mixtures were stirred at  $80\text{ }^{\circ}\text{C}$  and in case of iron, copper, and zinc, more ethanol was added to completely dissolve the formed precipitate. After 5 min the reaction mixtures were allowed to crystallize at room temperature. Crystallization process took 1 h up to 2 days. The compounds were filtered off before complete evaporation of the solvent and washed with cold ethanol.

### [Mn(C<sub>3</sub>tz)<sub>6</sub>](ClO<sub>4</sub>)<sub>2</sub> (14)

ECC **14** was received as colourless crystals. Yield: 338 mg (0.37 mmol, 82%).

**DTA** onset (5 °C min<sup>-1</sup>): 188 °C (endothermic), 206 °C (exothermic); **IR** (ATR, cm<sup>-1</sup>):  $\tilde{\nu}$  = 3121 (m), 3079 (w), 2980 (vw), 1571 (vw), 1498 (m), 1459 (vw), 1420 (w), 1361 (w), 1341 (vw), 1301 (w), 1225 (m), 1184 (m), 1101 (vs), 1089 (vs), 1070 (vs), 1043 (s), 990 (s), 951 (w), 906 (w), 878 (m), 836 (w), 720 (w), 671 (m), 622 (vs); **EA** (C<sub>24</sub>H<sub>36</sub>Cl<sub>2</sub>MnN<sub>24</sub>O<sub>8</sub>, 914.55) calcd.: C 31.52, H 3.97, N 36.76%, found: C 31.45, H 3.72, N 36.73%; **BAM drop hammer**: 5 J, **friction tester**: 216 N; **ESD**: 90 mJ (at grain size >1000 μm).

### [Fe(C<sub>3</sub>tz)<sub>6</sub>](ClO<sub>4</sub>)<sub>2</sub> (15)

Compound **15** was obtained as colourless crystals. Yield: 308 mg (0.33 mmol, 74%).

**DTA** onset (5 °C min<sup>-1</sup>): 192 °C (exothermic); **IR** (ATR, cm<sup>-1</sup>):  $\tilde{\nu}$  = 3121 (w), 3078 (w), 1571 (vw), 1499 (m), 1458 (w), 1420 (m), 1361 (w), 1300 (w), 1278 (w), 1225 (m), 1184 (m), 1101 (vs), 1089 (vs), 1070 (vs), 1042 (s), 1023 (m), 992 (s), 950 (w), 906 (w), 878 (m), 836 (m), 806 (w), 784 (vw), 720 (w), 671 (s), 622 (vs); **EA** (C<sub>24</sub>H<sub>36</sub>Cl<sub>2</sub>FeN<sub>24</sub>O<sub>8</sub>, 915.46) calcd.: C 31.49, H 3.96, N 36.72%, found: C 31.36, H 3.71, N 36.42%; **BAM drop hammer**: 3 J, **friction tester**: 54 N; **ESD**: 90 mJ (at grain size >1000 μm).

### [Cu(C<sub>3</sub>tz)<sub>6</sub>](ClO<sub>4</sub>)<sub>2</sub> (16)

ECC **16** crystallized as deep sky-blue hexagons within 1 h. Yield: 264 mg (0.29 mmol, 64%).

**DTA** onset (5 °C min<sup>-1</sup>): 174 °C (endothermic), 183 °C (exothermic); **IR** (ATR, cm<sup>-1</sup>):  $\tilde{\nu}$  = 3128 (m), 3079 (w), 1505 (m), 1459 (w), 1420 (m), 1361 (w), 1307 (w), 1227 (m), 1198 (w), 1184 (m), 1100 (vs), 1088 (vs), 1071 (vs), 1041 (s), 1003 (m), 986 (m), 950 (w), 937 (w), 904 (w), 878 (m), 835 (m), 772 (w), 720 (w), 671 (s), 622 (vs), 476 (vw); **EA** (C<sub>24</sub>H<sub>36</sub>Cl<sub>2</sub>CuN<sub>24</sub>O<sub>8</sub>, 923.13) calcd.: C 31.23, H 3.93, N 36.42%, found: C 31.18, H 3.98, N 36.53%; **BAM drop hammer**: 4 J, **friction tester**: 80 N; **ESD**: 480 mJ (at grain size 500–1000 μm).

### [Zn(C<sub>3</sub>tz)<sub>6</sub>](ClO<sub>4</sub>)<sub>2</sub> (17)

Complex **17** was obtained as colourless crystals. Yield: 308 mg (0.33 mmol, 74%).

**DTA** onset (5 °C min<sup>-1</sup>): 188 °C (endothermic), 201 °C (exothermic); **IR** (ATR, cm<sup>-1</sup>):  $\tilde{\nu}$  = 3124 (m), 3079 (w), 1572 (vw), 1501 (m), 1459 (w), 1420 (m), 1361 (w), 1341 (vw), 1302 (w), 1226 (m), 1198 (w), 1184 (m), 1169 (w), 1102 (vs), 1088 (vs), 1071 (vs), 1042 (s), 1025 (m),

995 (s), 950 (w), 937 (w), 907 (w), 878 (m), 836 (m), 772 (vw), 720 (w), 671 (s), 622 (vs), 473 (vw); **EA** (C<sub>24</sub>H<sub>36</sub>Cl<sub>2</sub>ZnN<sub>24</sub>O<sub>8</sub>, 924.99) calcd.: C 31.16, H 3.92, N 36.34 %, found: C 30.89, H 3.71, N 36.08 %; **BAM drop hammer**: 5 J, **friction tester**: 216 N; **ESD**: 90 mJ (at grain size 500–1000 μm).

### Copper(II) perchlorate complexes **18** and **19**

#### [Cu(C<sub>4</sub>tz)<sub>6</sub>(H<sub>2</sub>O)](ClO<sub>4</sub>)<sub>2</sub> (**18**)

Copper(II) perchlorate hexahydrate (167 mg, 0.45 mmol, 1.0 equiv.) and C<sub>4</sub>tz (335 mg, 2.70 mmol, 6.0 equiv.) were dissolved separately in acetonitrile (1 mL) and combined. The reaction mixture was stirred for 5 min at 80 °C and left to crystallize at room temperature, yielding the complex compound after 2 h. Perchlorate complex **18** was obtained as steel blue crystals: Yield 222 mg (0.29 mmol, 63%).

**DTA** onset (5 °C min<sup>-1</sup>): 191 °C (exothermic); **IR** (ATR, cm<sup>-1</sup>):  $\tilde{\nu}$  = 3492 (w), 3129 (w), 2992 (w), 2958 (w), 2907 (vw), 2869 (vw), 1572 (vw), 1506 (m), 1479 (vw), 1446 (w), 1439 (w), 1352 (w), 1307 (vw), 1254 (vw), 1226 (vw), 1199 (m), 1169 (w), 1090 (vs), 1065 (vs), 1012 (s), 952 (w), 933 (w), 909 (w), 848 (w), 731 (w), 718 (w), 670 (m), 622 (s), 468 (vw), 432 (vw); **EA** (C<sub>20</sub>H<sub>34</sub>Cl<sub>2</sub>CuN<sub>16</sub>O<sub>9</sub>, 777.04) calcd.: C 30.91, H 4.41, N 28.84%, found: C 31.03, H 4.48, N 29.02%; **BAM drop hammer**: 8 J, **friction tester**: 84 N; **ESD**: 250 mJ (at grain size >1000 μm).

#### [Cu(C<sub>5</sub>tz)<sub>4</sub>(H<sub>2</sub>O)](ClO<sub>4</sub>)<sub>2</sub> (**19**)

Copper(II) perchlorate hexahydrate (167 mg, 0.45 mmol, 1.0 equiv.) and C<sub>5</sub>tz (373 mg, 2.70 mmol, 6.0 equiv.) were dissolved separately in ethanol (1 mL). A precipitate was formed after the addition and more ethanol was used (5 mL). The reaction mixture was stirred for 5 min at 80 °C and left to crystallize at room temperature. Compound **19** was obtained as royal blue crystals. Yield: 225 mg (0.27 mmol, 60%). Grain size: >1000 μm.

**DTA** onset (5 °C min<sup>-1</sup>): 188 °C (endothermic), 207 °C (exothermic); **IR** (ATR, cm<sup>-1</sup>):  $\tilde{\nu}$  = 3495 (w), 3131 (w), 2964 (w), 2877 (w), 1639 (vw), 1573 (vw), 1503 (vw), 1452 (w), 1439 (w), 1360 (vw), 1313 (vw), 1208 (w), 1184 (w), 1084 (vs), 1063 (vs), 1016 (m), 931 (w), 898 (m), 679 (w), 622 (s), 419 (vw); **EA** (C<sub>24</sub>H<sub>42</sub>Cl<sub>2</sub>CuN<sub>16</sub>O<sub>9</sub>, 833.15) calcd.: C 34.60, H 5.08, N 26.90%, found: C 34.60, H 4.95, N 26.90%; **BAM drop hammer**: 6 J, **friction tester**: 144 N; **ESD**: 250 mJ (at grain size >1000 μm).





## 9. References

- S1 *CrysAlisPro*, Oxford Diffraction Ltd., version 171.33.41, **2009**.
- S2 A. Altomare, G. Cascarano, C. Giacovazzo and A. Guagliardi, *J. Appl. Crystallogr.* 1993, **26**, 343–350.
- S3 a) A. Altomare, G. Cascarano, C. Giacovazzo, A. Guagliardi, A. G. G. Moliterni, M. C. Burla, G. Polidori, M. Camalli and R. Spagna, *SIR97*, **1997**; b) A. Altomare, M. C. Burla, M. Camalli, G. L. Cascarano, C. Giacovazzo, A. Guagliardi, A. G. G. Moliterni, G. Polidori and R. Spagna, *R. J. Appl. Crystallogr.* **1999**, 32, 115–119.
- S4 a) G. M. Sheldrick, *SHELXL-97*, University of Göttingen, Germany, **1997**; b) G. M. Sheldrick, *Acta Crystallogr. Sect. A* **2008**, 64, 112–122.
- S5 A. L. Spek, *PLATON*, Utrecht University, The Netherlands, **1999**.
- S6 L. J. Farrugia, *J. Appl. Cryst.* **2012**, 45, 849–854.
- S7 Empirical absorption correction using spherical harmonics, implemented in SCALE3 ABSPACK scaling algorithm (CrysAlisPro Oxford Diffraction Ltd., Version 171.33.41, 2009).
- S8 *APEX3*. Bruker AXS Inc., Madison, Wisconsin, USA.
- S9 NATO standardization agreement (STANAG) on explosives, impact sensitivity tests, no. 4489, 1st ed., Sept. 17, **1999**.
- S10 WIWEB-Standardarbeitsanweisung 4-5.1.02, Ermittlung der Explosionsgefährlichkeit, hier der Schlagempfindlichkeit mit dem Fallhammer, Nov. 8, **2002**.
- S11 <http://www.ozm.cz>, Accessed January 2021.
- S12 <http://www.bam.de>, Accessed January 2021.

- S13 NATO standardization agreement (STANAG) on explosive, friction sensitivity tests, no. 4487, 1st ed., Aug. 22, **2002**.
- S14 WIWEB-Standardarbeitsanweisung 4-5.1.03, Ermittlung der Explosionsgefährlichkeit oder der Reibeempfindlichkeit mit dem Reibeapparat, Nov. 8, **2002**.
- S15 Impact: insensitive > 40 J, less sensitive  $\geq$  35 J, sensitive  $\geq$  4 J, very sensitive  $\leq$  3 J; Friction: insensitive > 360 N, less sensitive = 360 N, sensitive < 360 N and > 80 N, very sensitive  $\leq$  80 N, extremely sensitive  $\leq$  10 N. According to the UN Recommendations on the Transport of Dangerous Goods, 5<sup>th</sup> ed., **2009**.
- S16 *MultiVu*, Version 1.5.11; Quantum Design Inc.: San Diego, USA, **2013**.
- S17 G. A. Bain and J. F. Berry, *J. Chem. Educ.* 2008, **85**, 532–536.
- S18 A. A. Soliman, M. M. Khattab, M. Reissner, P. Weinberger, F. Werner and W. Linert, *Inorg. Chim. Acta*, 2007, **360**, 3987–3996.
